1 Structure of a proton-powered molecular motor that drives protein transport and gliding motility

2 Rory Hennell James<sup>1,2\*</sup>, Justin C. Deme<sup>1,2,3\*</sup>, Andreas Kjær<sup>2</sup>, Felicity Alcock<sup>2,4</sup>, Augustinas Silale<sup>2,4</sup>,

3 Frédéric Lauber<sup>2</sup>, Ben C. Berks<sup>2†</sup>, and Susan M. Lea<sup>1,3†</sup>

4

5

6 <sup>1</sup> Sir William Dunn School of Pathology, University of Oxford, South Parks Road, Oxford OX1 3RE,  
7 United Kingdom.

8 <sup>2</sup> Department of Biochemistry, University of Oxford, South Parks Road, Oxford OX1 3QU, United  
9 Kingdom.

10 <sup>3</sup> The Central Oxford Structural Molecular Imaging Centre (COSMIC), University of Oxford, South Parks  
11 Road, Oxford OX1 3RQ, United Kingdom.

12 4. Current address: CBCB, Newcastle Univeristy, NE17RU UK

13 \* These authors contributed equally to this work.

14 † To whom correspondence should be addressed. S.M.Lea ([susan.lea@path.ox.ac.uk](mailto:susan.lea@path.ox.ac.uk)); B.C.Berks  
15 ([ben.berks@bioch.ox.ac.uk](mailto:ben.berks@bioch.ox.ac.uk)).

## 16 **Summary**

17 Ion-driven motors are rare in biology. The archetypes of the three classes identified to date are ATP  
18 synthase, the bacterial flagellar motor, and a proton-driven motor that powers gliding motility and  
19 protein secretion in *Bacteroidetes* bacteria. Whilst the molecular mechanism of ATP synthase is now  
20 well understood, structural information is lacking for the other two classes of motor. Here we present  
21 the structure of the *Bacteroidetes* gliding motility motor determined by cryo-electron microscopy. The  
22 motor is an asymmetric inner membrane protein complex in which the single transmembrane helices  
23 of two periplasm-spanning GldM proteins are positioned within a ring of five GldL proteins. Combining  
24 mutagenesis and single-molecule tracking, we identify protonatable amino acid residues within the  
25 transmembrane domain of the complex that are important for motor function. Our data imply a  
26 mechanism in which proton flow leads the periplasm-spanning GldM dimer to rotate with respect to  
27 the intra-membrane GldL ring to drive processes at the bacterial outer membrane. This work provides  
28 a molecular basis for understanding how the gliding motility motor is able to transduce the energy of  
29 the inner membrane protonmotive force across the bacterial cell envelope.

30

31 **Main**

32 The use of transmembrane ion-motive electrochemical gradients to drive biochemical processes is  
33 one of the fundamental features of cellular life<sup>1</sup>. Most commonly ion movement down the  
34 electrochemical gradient is coupled to transport processes or signalling. However, ion gradients can  
35 also be exploited to power the mechanical motions of membrane-associated molecular motors. Three  
36 classes of ion-driven machines are known. In ATP synthases the ion-motive gradient drives a rotary  
37 movement that results in the energy-requiring release of ATP from the catalytic sites of the enzyme<sup>2,3</sup>.  
38 A second class of ion-driven mechanical motor is associated with the bacterial flagellum that drives  
39 swimming motility. In this system, ion flow through stator units linked to the cell wall results in a  
40 mechanical force on the base of the flagellum that causes the flagellum to rotate<sup>4,5</sup>(Deme et al.,  
41 companion paper). Additional members of the flagellar stator family include the periplasm-spanning  
42 Ton and Tol complexes which mechanically drive processes at the outer membrane (OM) of Gram-  
43 negative bacteria using the inner membrane (IM) protonmotive force (PMF)<sup>6,7</sup>(Deme et al. companion  
44 paper). The third type of ion driven motor is found in bacteria of the phylum *Bacteroidetes*. The motor  
45 in these bacteria powers rapid gliding motility across solid surfaces<sup>8</sup> using the PMF across the IM as  
46 the energy source<sup>9-11</sup>. The gliding motility motor generates a rotary motion at the cell surface<sup>11</sup> that  
47 results in a helical flow of surface adhesins<sup>9,12,13</sup>, possibly by driving a mobile track to which the  
48 adhesins are attached<sup>14</sup>.

49 Work with the model gliding bacterium *Flavobacterium johnsoniae* strongly suggests that the two  
50 conserved IM proteins GldL and GldM form the PMF-transducing gliding motility motor<sup>15</sup>(Fig. 1a).  
51 Neither of these proteins has detectable sequence similarity to the components of the other classes  
52 of ion-driven motors. GldL is composed of two predicted transmembrane helices (TMH) followed by a  
53 long cytoplasmic tail<sup>16</sup>. GldM is mainly periplasmic and anchored to the IM by a N-terminal TMH<sup>16</sup>. A  
54 recent structure of the periplasmic portion of GldM reveals that it contains four folded domains which  
55 assemble as a homodimeric rod that is long enough (180Å) to span the periplasm<sup>17</sup>. The distal end of

56 GldM contacts a large ring structure at the OM, composed of the proteins GldK and GldN, which is  
57 thought to link the GldLM motor to the gliding apparatus<sup>17,18</sup>.

58 In addition to their role in gliding motility, GldL and GldM have been found to be essential for  
59 protein export across the OM by the *Bacteroidetes*-specific Type IX secretion system (T9SS)<sup>15,19</sup>. Thus,  
60 the gliding motility motor is likely to also be involved in energizing protein movement through the  
61 T9SS apparatus<sup>20-22</sup>. Notably, GldLM homologues are still required for protein secretion in non-gliding  
62 *Bacteroidetes* species with a T9SS, such as *Porphyromonas gingivalis*, the causative agent of severe  
63 periodontal disease<sup>19,22</sup>. The involvement of GldLM in the T9SS leads to the prediction that Type 9  
64 protein transport should be energized by the PMF. In agreement with this hypothesis, we find that  
65 protein export by the T9SS is PMF-dependent (Extended Data Fig. 1).

66

#### 67 **The GldLM is an inherently asymmetric 5:2 subunit complex**

68 The intact GldLM motor complex proved unsuitable for high resolution structure determination by  
69 cryo-electron microscopy because the anisotropic shape of the molecule led to a poor distribution of  
70 views. However, imaging a *F. johnsoniae* GldLM complex in which the GldM protein has been C-  
71 terminally truncated after the first folded periplasmic domain (hereafter referred to as GldLM')  
72 allowed the calculation of an EM volume at 3.9 Å resolution and *de novo* building of a full atomic  
73 model (Fig. 1b-e, Extended Data Table 1, Extended Data Fig. 2-3). The transmembrane domain of the  
74 complex is fully defined in the resulting model (Fig. 1c-e). GldL is ordered between residue 3 and 62  
75 (Fig 1b) with 153 residues of the cytoplasmic C-terminus not resolved in the current volume. The  
76 ordered portion of GldL forms a pair of TMHs arranged at ~25° to the membrane normal with a well-  
77 structured loop joining them on the periplasmic face of the membrane (Fig. 1b). Almost the entirety  
78 of the truncated GldM construct could be modelled (residue 7 to 225, Fig. 1b). The single-pass TMH is  
79 resolved and is topped by the periplasmically-located helical domain (0.7Å RMSD to the X-ray

80 structure) (Fig. 1b). The overall complex is formed from five copies of GldL and two copies of GldM  
81 (Fig. 1d,e) with the GldL TMH pairs forming a distorted pentameric cage enclosing the two copies of  
82 the GldM TMH. Consequently, the predicted TMH of GldM is found entirely within a proteinaceous  
83 environment with no exposure to the lipid bilayer (Fig. 1e). The periplasmic domains of the GldM  
84 subunits pack against the top of the ring of GldL TMHs (Fig. 1d,e).

85 The overall structure of the GldLM' complex is strikingly asymmetric both in the plane of the  
86 membrane, due to the stoichiometry mismatch of the two types of subunit within the TM helix bundle,  
87 and because the periplasmic domains of GldM adopt different tilts relative to the top of their TMHs  
88 (Fig. 1d,e). The result is that both within the membrane domain, and at the periplasmic subunit  
89 interface, each of the five copies of GldL make different contacts to GldM (Extended Data Table 2).  
90 Notably, only a single conformation of the GldLM' complex is seen in our current data. Within the  
91 GldLM' complex the TMHs are closely packed (Fig. 1e), implying that conformational change in the  
92 TMH of one subunit of the complex will only be possible if there are concerted conformational changes  
93 in the other subunits. As expected, the surfaces buried between the subunits of the GldLM' complex  
94 are highly conserved and the exposed surfaces highly variable (Extended Data Fig. 4).

95

96

97

## 98 **Identification of functionally important residues within the transmembrane domain of the GldLM** 99 **complex**

100 The membrane domain of a proton-driven motor is anticipated to contain protonatable amino  
101 acid side chains that function to couple the transmembrane proton flow to the conformational  
102 changes required to do mechanical work. We, therefore, used site directed amino acid substitutions  
103 to test the functional importance of polar residues within the GldLM transmembrane helical bundle.

104 No GldM protein was detected for variants with non-conservative substitutions of GldM<sub>R9</sub>, probably  
105 because this residue functions as a topogenic signal for membrane protein insertion<sup>23</sup> (Extended Data  
106 Fig. 5). The GldL<sub>E49D</sub> variant also had reduced levels of protein expression, but this change is insufficient  
107 to account for the complete null phenotype of this variant (below).

108 Gliding motility was assessed by spreading behaviour on agar plates (Fig. 2a) and by microscopic  
109 examination of gliding on glass (Extended Data Table 3 and Supplementary Video 1). T9SS activity in  
110 the mutant strains was assessed through monitoring secreted chitinase activity (Fig. 2b). The effects  
111 of the substitutions on gliding were more severe than on T9SS function, suggesting that motility  
112 requires a higher level of motor function. The gliding phenotypes of the GldLM variants will reflect not  
113 only the direct effect of the substitutions on adhesin movement but also their influence on the T9SS-  
114 dependent export of the adhesins<sup>15</sup>. To assess the effects of the motor protein substitutions on  
115 adhesin flow independent of T9SS function, we tracked the movements of individual fluorophore-  
116 labelled adhesin molecules. In mutants that showed impaired gliding, but which retained the ability  
117 to export adhesins to the cell surface, the adhesin molecules were still observed to move in helical  
118 patterns. However, the average speed of adhesin movement was dramatically slower than in the  
119 parental strain (Fig. 2c,d and Supplementary Videos 2-7). Thus, the GldLM substitutions in these  
120 strains directly affect the mechanical force driving adhesin movement, as expected of defects in the  
121 gliding motility motor.

122 The results of our amino acid substitution experiments (Extended Data Table 3) show that  
123 functionally important protonatable amino acids are clustered both within the membrane core of the  
124 GldLM complex and at the periplasmic GldL/GldM interface (Fig. 2e). The tight packing of the  
125 transmembrane helix bundle (Fig. 1e) seen in the structure provides no route for proton movement  
126 between these two layers of residues. This implies that the motor cycle must include a conformational  
127 change to open an aqueous channel between these regions at one point in the ring.

128 Within the membrane core the invariant residues Gld<sub>L</sub>E<sub>49</sub> and GldM<sub>Y</sub>17 and the highly conserved  
129 residues Gld<sub>L</sub>Y<sub>13</sub> and GldM<sub>R</sub>9 are important for motor function. The symmetry mis-match in the GldLM'  
130 complex means that within each chain these residues are in a different environment. Thus, in one  
131 GldM copy GldM<sub>R</sub>9 (chain B; coloured grey in the figures) is positioned to form a salt bridge with Gld<sub>L</sub>E<sub>49</sub>  
132 (chain E, coloured salmon in the figures), whilst GldM<sub>Y</sub>17 (chain A, coloured white in the figures) and  
133 Gld<sub>L</sub>Y<sub>13</sub> (chain E) bracket this pair of residues (Fig 3a). By contrast, GldM<sub>R</sub>9 in the other copy of GldM  
134 (chain A) is rotated away from Gld<sub>L</sub>E<sub>49</sub> on the nearest GldL subunit and so these two residues are no  
135 longer positioned to interact. The substitution data show that protonation of the Gld<sub>L</sub>Y<sub>13</sub> and GldM<sub>Y</sub>17  
136 side chains is important for their function, as expected if these residues are involved in transducing  
137 transmembrane proton movements to mechanical work. However, the substitution data also show  
138 the importance of the aromatic nature of Gld<sub>L</sub>Y<sub>13</sub> and GldM<sub>Y</sub>17, suggesting that these residues are  
139 additionally involved in mechanistically important packing interactions.

140

#### 141 **Structural asymmetry in the GldLM' complex**

142 An overlay of the two GldM' subunits shows that the cytoplasmic end of the TMH must be bent in  
143 order for GldM<sub>R</sub>9 to ion pair with Gld<sub>L</sub>E<sub>49</sub> (Fig. 3b). In this ion-paired copy of GldM the angle between  
144 the TMH and the periplasmic domain is less acute than in the other GldM chain, and so the periplasmic  
145 domain is less tilted relative to the GldL ring (Figs. 2e and 3c). Indeed, it is the periplasmic domain of  
146 the GldM subunit that is not participating in the ion pair that tilts sufficiently to make extensive  
147 interactions with the top of the ion-paired GldL subunit (Fig. 2e and 3b,c).

148 An overlay of the five copies of the GldL protein found in the GldLM' complex reveals that the helix  
149 in which Gld<sub>L</sub>E<sub>49</sub> is positioned to ion pair with GldM<sub>R</sub>9 is shifted compared to the equivalent helix in the  
150 other copies of GldL (Fig. 3c). This helix movement is accompanied by a reorientation of Gld<sub>L</sub>Y<sub>13</sub> located  
151 on the second TMH of the same chain and a remodelling of the periplasmic loop that is packed against

152 the GldM periplasmic domain (Fig. 3c). These changes in GldL conformation are likely linked to  
153 conformational differences between the two copies of GldM and imply that mechanical forces exerted  
154 on the GldM subunits within the membrane are reinforced by interactions between the GldM  
155 periplasmic domains and the top of the GldL ring. Notably, substitution of two invariant residues  
156 (GldL<sub>K17</sub> and GldL<sub>H20</sub>) within the GldL periplasmic loop that appear to mediate interactions with the  
157 GldM periplasmic domain significantly impair gliding motility (Figs. 2a,c,d and 3c).

158 Taken together these observations show that the presence or absence of the GldM<sub>R9</sub> – GldL<sub>E49</sub> ion  
159 pair in the two copies of the GldM protein is linked to conformational differences between the  
160 proteins. This suggests a simple model of reciprocal conformational change between the two GldM  
161 copies to produce mechanical force in the periplasm. In this model the GldM<sub>R9</sub> – GldL<sub>E49</sub> ion pair  
162 involving one GldM subunit is broken by protonation of GldL<sub>E49</sub> by an incoming proton from the  
163 periplasmic side of the membrane, subsequent to which GldM<sub>R9</sub> on the other GldM subunit forms an  
164 equivalent ion pair through ejection of a proton from GldL<sub>E49</sub> on the nearest GldL molecule. GldM<sub>Y17</sub>  
165 and GldL<sub>Y13</sub> are well-positioned to act as the proton donor and acceptor, respectively, to the GldM<sub>R9</sub> –  
166 GldL<sub>E49</sub> ion pair. In this context, the movement of the GldL<sub>Y13</sub> side chain away from the ion pair in the  
167 salt-bridged copy of GldL might be a mechanism to prevent the immediate short-circuiting transfer of  
168 the proton to the cytoplasm following protonation of the ion pair. Co-operative movements of the  
169 two GldM proteins will be reinforced by the fact that it is the GldM subunit that is not involved in the  
170 ion pair that both provides the apparent proton donor to the ion pair (through GldM<sub>Y17</sub>) and that  
171 possesses the periplasmic domain that forms intimate contacts with the periplasmic loops of the GldL  
172 subunit involved in the ion pair.

173

174 **Orientation of the GldM periplasmic domains**



175 An overlay of the first periplasmic domains of GldM in our cryoEM structure with the equivalent  
176 domains in the previously reported crystal structures of the dimeric, isolated, GldM periplasmic  
177 region<sup>17</sup> demonstrates that the two copies of the domain are splayed apart in the cryoEM structure  
178 compared to the earlier crystal structure (Fig. 4a). We were concerned that this difference between  
179 the two structures might have arisen due to our truncation of the periplasmic region of GldM, even  
180 though neither co-variance nor conservation suggest a strong dimerization interface between these  
181 first periplasmic domains (Extended Data Fig. 4) and the isolated domain from the *P. gingivalis*  
182 homologue crystallises as a monomer<sup>17</sup>. To resolve this issue we turned to lower resolution cryoEM  
183 volumes derived from images of full length GldLM complexes. Data from the *P. gingivalis* GldLM  
184 homologue PorLM were of sufficient quality to allow location of the two TMH helices of PorM enabling  
185 us to position the atomic model for *F. johnsoniae* GldLM' within the lower resolution *P. gingivalis*  
186 PorLM volume (Fig 4b,c). Interpretation of the lower resolution volume in this way demonstrates that  
187 even in the context of the full length GldM homologue the GldM first periplasmic domains are splayed  
188 with an acute (and different between the two copies) angle between the first and second domains  
189 (Fig 4c). Density for the second periplasmic domain is also visible in the volume and is compatible with  
190 the strand-swapped dimeric arrangement of this domain seen in the crystal lattice despite the  
191 separation of the first domain. The splaying of GldM is likely driven by packing of the first periplasmic  
192 domains onto the top of the GldL transmembrane domains and packing of the N-terminal helices  
193 within the GldL cage. The need to anneal the two GldM chains above this domain may explain the  
194 unusual strand-swapped dimer that forms the next (second) periplasmic domain. More distal domains  
195 were only present in the volume at very low contour levels presumably due both to their distance  
196 from the centre of the alignment and to some conformational variability of the entire periplasmic  
197 portion with respect to the transmembrane region. Nevertheless, no further large deviations from a  
198 linear conformation are seen for the distal domains. Combining our structural information with the  
199 earlier crystallographic data generates a composite model for the GldLM complex in which the rod-

200 like periplasmic region of GldM projects into the periplasm at an appreciable angle away from the  
201 membrane normal (Fig. 4d).

202

## 203 **Discussion**

204 The GldLM' structure reveals an asymmetric complex bedded in the inner membrane. The lack of  
205 shared symmetry between the components of the GldLM' complex, together with the caging of GldM  
206 within GldL, suggests that rotation of GldM within the GldL ring is the most likely mechanical  
207 movement produced by the motor. This type of motion would be consistent with the observation  
208 that the gliding motility system is able to generate rotary motion at the cell surface<sup>11</sup>. In order for the  
209 GldLM motor to drive processes at the OM through rotation of the distal end of GldM, GldL must  
210 remain stationary in the IM to act as a stator to the rotating GldM protein. GldL cannot be immobilized  
211 by binding to the cell wall since GldM covers the parts of GldL that are exposed at the periplasmic side  
212 of the membrane. Instead, it is likely that GldL is held in position through interactions between the  
213 currently unvisualized cytoplasmic tail and a static cytoplasmic structure. Sequential morphing of the  
214 structure between the GldL conformational states was used to produce an animation that indicates  
215 the approximate molecular changes that would occur in the GldLM complex on rotation of the GldM  
216 periplasmic domain (Supplementary Video 8).

217 The arrangement of the ten GldL TMHs around two central GldM TMHs is reminiscent of the  
218 structural organization of the transmembrane core of the flagellar MotAB stator complex (reported in  
219 our companion paper (Deme et al. companion paper)) and the related ExbBD complex of the Ton  
220 system <sup>6</sup>(Deme et al. companion paper) even though the mobile and stationary components of the  
221 GldLM motor are reversed relative to MotAB. This organizational similarity is particularly remarkable  
222 given the lack of detectable sequence similarity between GldLM and the subunits of the other motor

223 complexes. The implications of this protein architecture being shared between bacterial ion-driven  
224 motors are discussed in the companion paper (Deme et al., companion paper).

225

226

## 227 **Acknowledgements**

228 We thank Mark McBride and Yongtao Zhu for providing reagents for the genetic manipulation of *F.*  
229 *johnsoniae*. We thank Luke Lavis for supplying the Janelia Fluor ligands, Sam Hickman for advice on  
230 fluorescence imaging, and Alan Wainman for assistance with phase contrast imaging. We thank Paul  
231 Guy for his involvement in producing the pulse-chase mCherry-CTD fusion construct and Richard Berry  
232 for discussions and comments on the manuscript. We acknowledge the use of the Central Oxford  
233 Structural Microscopy and Imaging Centre (COSMIC), the Oxford Micron Advanced Imaging Facility,  
234 and the Oxford Advanced Proteomics Facility. We thank Kevin Foster for providing additional imaging  
235 facilities. This work was supported by Wellcome Trust studentships to R.H.J. and A.S., a Biotechnology  
236 and Biological Sciences Research Council studentship to A.K., and Wellcome Trust Investigator Awards  
237 107929/Z/15/Z and 100298/Z/12/Z. COSMIC was supported by a Wellcome Trust Collaborative Award  
238 201536/Z/16/Z, the Wolfson Foundation, a Royal Society Wolfson Refurbishment Grant, the John Fell  
239 Fund, and the EPA and Cephalosporin Trusts.

240

## 241 **Author contributions**

242 R.H.J carried out all genetic and biochemical work except as credited otherwise. J.C.D. and S.M.L.  
243 collected EM data and determined the structure. A.K. developed and carried out the SprB tracking  
244 experiments including strain construction. F.A. carried out the pulse chase analysis of protein export,  
245 A.S. assayed cellular ATP levels, F.L. constructed the  $\Delta gldL$  strain and produced the GldL and GldM  
246 antibodies. B.C.B. and S.M.L. conceived the project. All authors interpreted data and wrote the  
247 manuscript.

248

249 **Figure legends**

250

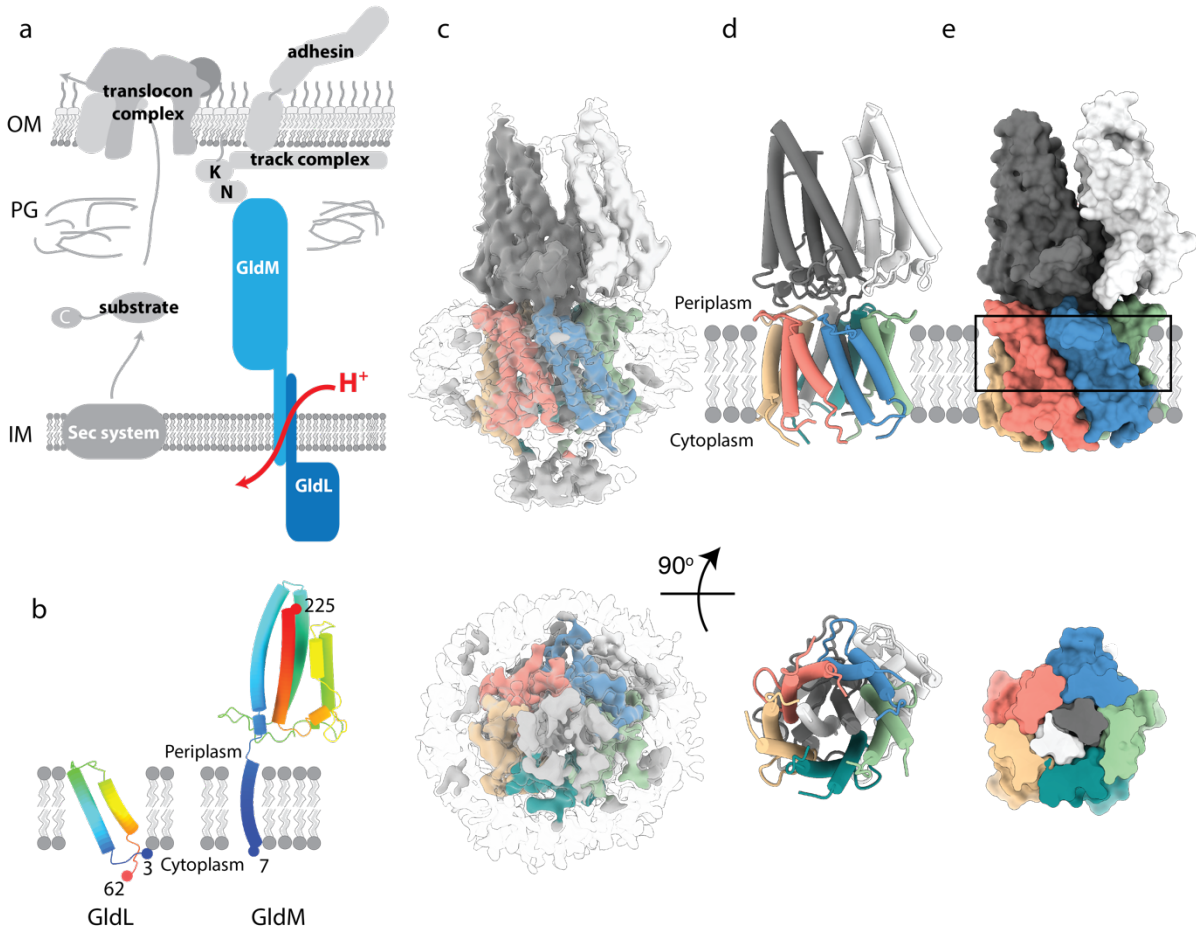

251

252 **Fig. 1 | Structure of the *F. johnsoniae* GldLM' complex.** **a**, Schematic showing the relationship of the  
253 GldLM complex to the major components of the T9SS (left) and gliding motility (right) systems. OM,  
254 outer membrane; IM inner membrane; PG peptidoglycan. **b**, Structures of individual GldL and GldM  
255 subunits extracted from the complex. **c**, 3D cryo-EM reconstruction of the LMNG-solubilised GldLM'  
256 complex at high (coloured by protein chain) and low (semi-transparent grey) contours. The detergent  
257 micelle is seen at the low contour level and is used to estimate the location of the membrane bilayer  
258 shown in **d,e**. **d,e** Cartoon and space-filling representations of the GldLM' complex. The GldL subunits  
259 are coloured salmon, blue, green, teal, and yellow, and the GldM subunits are coloured white and dark  
260 grey. In **e** the lower panel shows a slab through the region indicated by the box in the upper panel. In  
261 **c-e** the lower panels show the complex viewed from the cytoplasm.

262

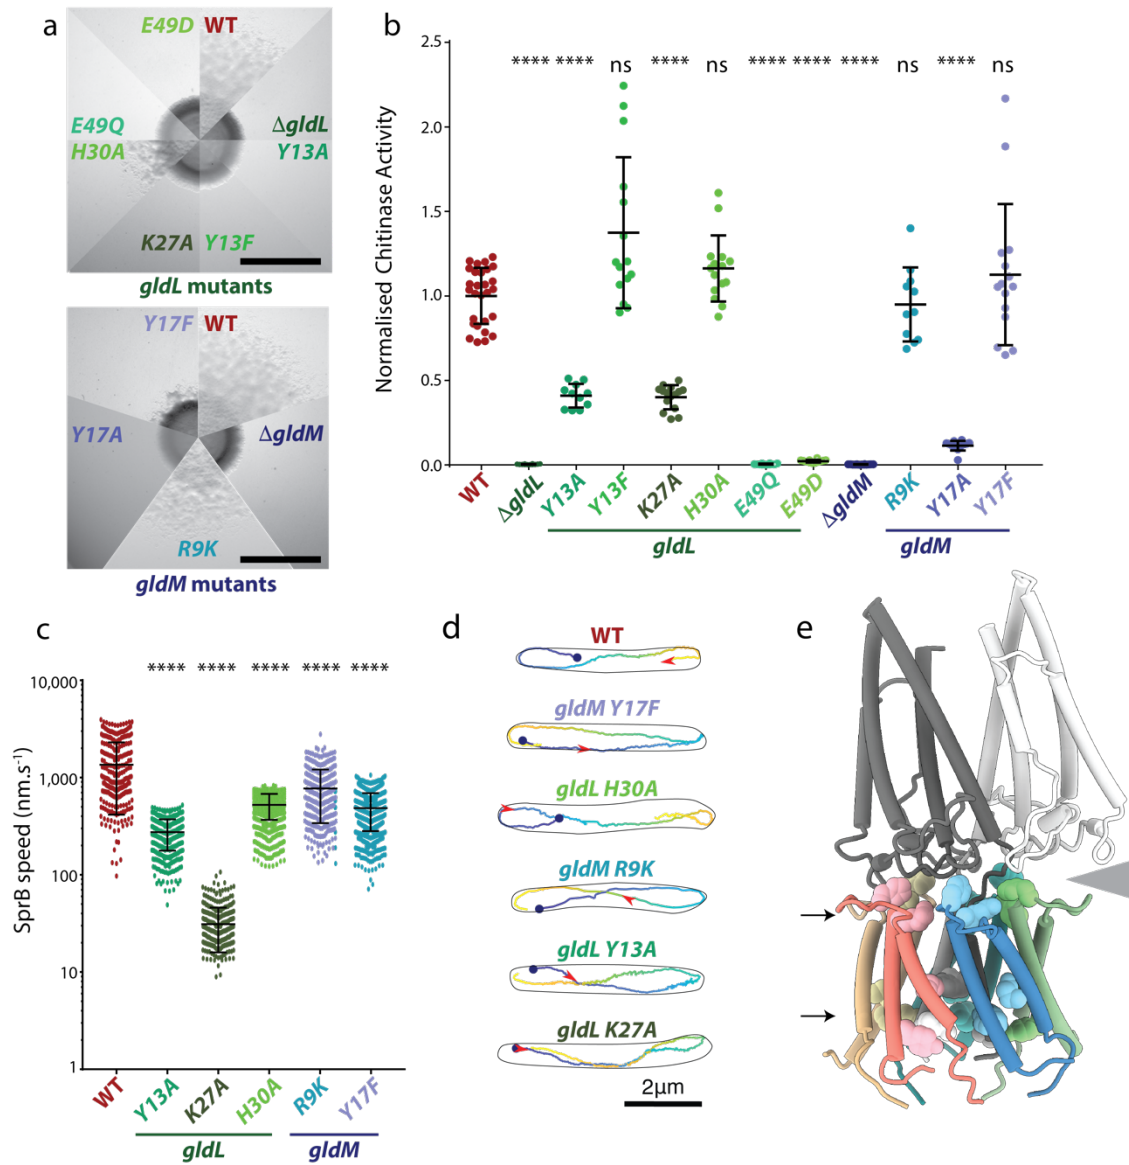

263

264

265 **Fig. 2 | Functional analysis of protonatable residues in the transmembrane domain of GldLM. a-d,**  
 266 **Phenotypic comparisons between wild type (WT) cells and *gldLM* single codon mutants. a,** Gliding  
 267 **motility assessed by spreading on agar plates. b,** Extracellular levels of the T9SS-secreted enzyme  
 268 **chitinase. Error bars show 1 standard deviation. Significance of differences relative to WT were**  
 269 **assessed with Dunn's multiple comparisons test (non normally distributed) or Dunnet's multiple**  
 270 **comparison test. \*\*\*\* =  $p < 0.0001$ , ns = not significant. At least 3 technical replicates of at least 3**  
 271 **biological repeats were performed for each strain. c-d,** Cell surface movement of single fluorophore-  
 272 **labelled SprB adhesin molecules. c,** Plot showing the speed of helically moving adhesins in a WT (321  
 273 **tracks), *gldL*<sub>Y13A</sub> (499 tracks), *gldL*<sub>K27A</sub> (369 tracks), *gldL*<sub>H30A</sub> (2,259 tracks), *gldM*<sub>R9K</sub> (429 tracks) or**  
 274 ***gldM*<sub>Y17F</sub> (1519 tracks) background. For each strain the tracks are pooled data from the analysis of 3**  
 275 **independent cultures. Error bars show 1 standard deviation. Significance of differences relative to the**  
 276 **WT was assessed with Dunn's multiple comparisons test. \*\*\*\* =  $p < 0.0001$ . d,** Examples of adhesin  
 277 **helical tracks extracted from Supplementary Videos 2-7 and coloured from blue (start) to yellow (end).**

278 The red arrowhead marks the position along the track that the adhesin has reached at 3.5s after the  
279 start point (blue dot). e, Protonatable residues in GldLM that exhibit reduced function when  
280 substituted. The residues are shown in space-filling representation on a cartoon model of GldLM' and  
281 fall in two bands (indicated with arrows) located at the periplasmic GldL-GldM interface and close to  
282 the cytoplasmic end of the TMH bundle. The grey wedge indicates the space between one of the GldM  
283 subunits and the top of the GldL ring.  
284

285

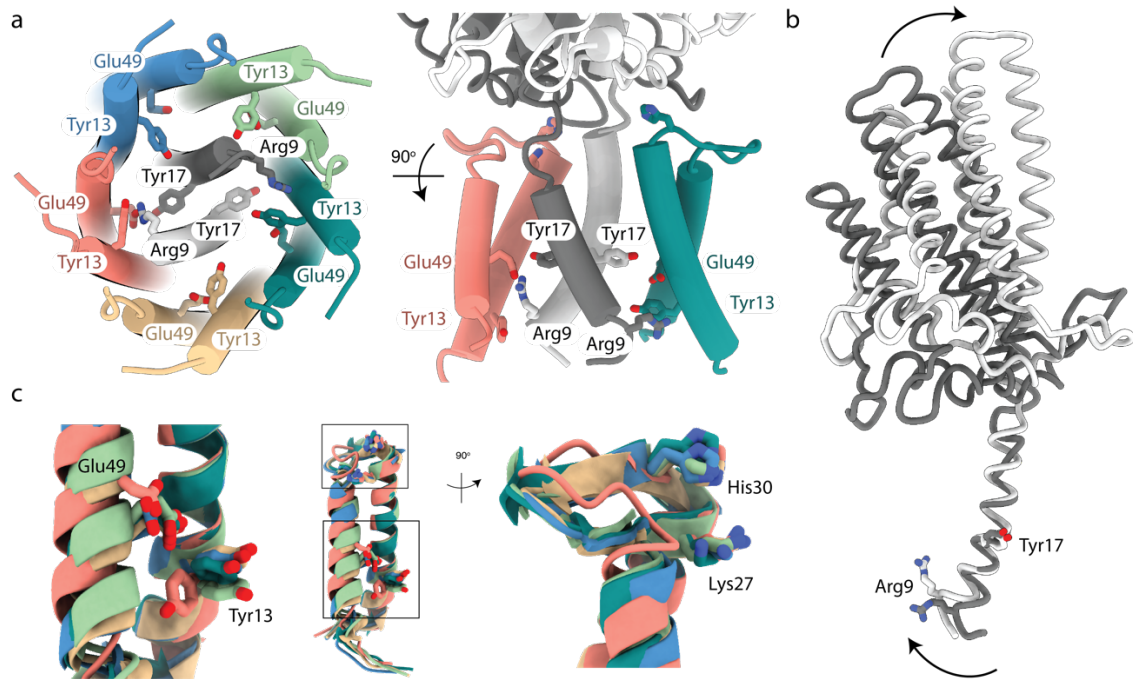

286

287 **Fig. 3 | The structural asymmetry of the GldLM' complex leads to important differences in residue**  
288 **environments between chains.** The side chains of functionally important residues are shown in stick  
289 representation with oxygen atoms red and nitrogen atoms blue. Proteins chains are coloured as in Fig.  
290 1 c-e. **a**, The side chains of functionally important residues near the cytoplasmic end of the TMH bundle.  
291 For clarity, only two GldL subunits are shown in the right hand view. **b**, Overlay of the two copies of  
292 GldM by superposition of the TMH. **c**, Superposition of the five copies of GldL by overlaying TMH2.  
293 The boxes in the central panel indicating the positions of the two regions magnified on either side.

294



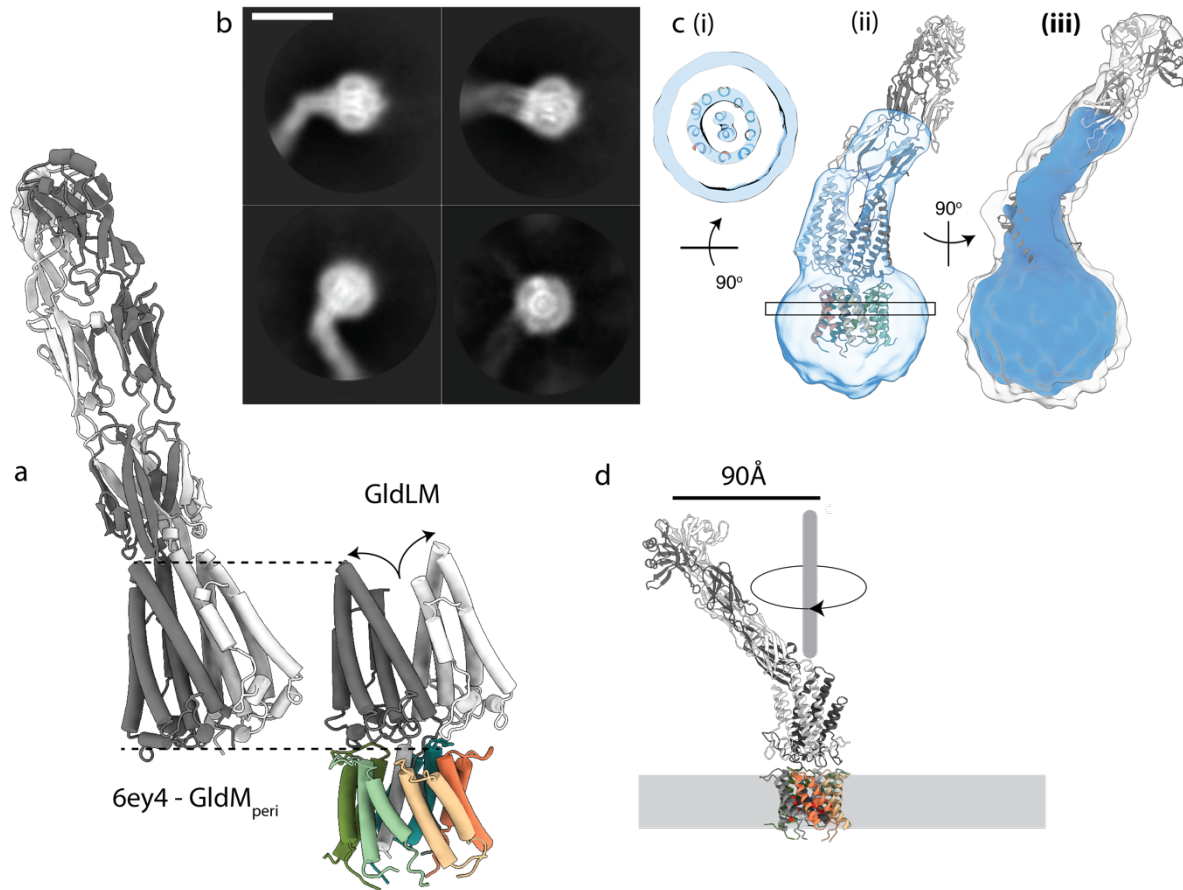

295

296 **Fig. 4 | Structure of the full length motor complex.** a, Comparison of the crystal structure of the  
297 periplasmic domains of GldM (PDB 6ey4, GldM<sub>peri</sub>) with the cryoEM structure of the periplasmically  
298 truncated GldLM' complex. The structures are displayed with the first periplasmic domain of the dark  
299 grey GldM chain aligned (dotted lines) and demonstrate the splaying (curved arrows) of the GldM  
300 chains in the context of the truncated complex. b, Representative 2D classes from micrographs of the  
301 full-length *P. gingivalis* motor (PorLM) showing detail in the transmembrane region (all 4 panels), a  
302 large bend between the first two periplasmic domains of PorM (left panels), and splaying of the first  
303 periplasmic domains of the two copies of PorM (upper right panel). Scale bar 100 Å. c, Different views  
304 of the *P. gingivalis* motor 3D cryo-EM volume at a high (blue) and low (white) contour level. (i) The  
305 PorM TMHs can be resolved allowing confident placement of the *F. johnsoniae* GldLM' model in the  
306 volume. (ii) Splaying of the PorM first periplasmic domain pair is seen as in the *F. johnsoniae* GldLM'  
307 complex. (iii) The extension to the volume seen at a low contour level matches well to the length and  
308 shape of the dimeric GldM periplasmic domains 2-4 seen in the crystal structure. d, Cartoon to  
309 demonstrate how the bend between periplasmic domains 1 and 2 would allow the tip of a rotating  
310 GldM/PorM to define a large track at the outer-membrane.

311

312 **Methods**

313 No statistical methods were used to predetermine sample size. The experiments were not randomized  
314 and the investigators were not blinded to allocation during experiments and outcome assessment.

315

316 **Bacterial strains and growth conditions**

317 All strains and plasmids used in this work are listed in Extended Data Tables 4 and 5. *F. johnsoniae*  
318 was routinely grown in Casitone Yeast Extract (CYE) medium<sup>24</sup> at 30 °C with shaking. To assess motility  
319 on glass and for chitinase secretion measurements cells were grown in Motility Medium<sup>25</sup> (MM). PY2  
320 medium<sup>26</sup> was used to assess motility on agar plates. *E. coli* cells were routinely grown in Luria Bertani  
321 (LB) medium at 37 °C with shaking. When required, antibiotics were added at the following  
322 concentrations: erythromycin, 100 µg ml<sup>-1</sup>; spectinomycin, 100 µg ml<sup>-1</sup>; ampicillin, 100 µg ml<sup>-1</sup>;  
323 kanamycin, 30 µg ml<sup>-1</sup>.

324

325 **Genetic constructs**

326 All primers used in this work are described in Supplementary Data Table 1. All plasmid constructs  
327 were verified by sequencing.

328 A vector directing the co-expression of *F. johnsoniae* GldL and C-terminally truncated GldM was  
329 produced as follows. The chromosomal region encoding GldL and the first 225 amino acids of GldM  
330 was amplified using primers RHJ164 and RHJ165. The plasmid pT12<sup>27</sup> was linearized by amplification  
331 with primers RHJ162 and RHJ163. The two fragments were assembled by Gibson cloning to yield  
332 plasmid pRHJ007. A vector for expression of *F. johnsoniae* GldL and the first 232 amino acids of GldM  
333 was produced similarly, using primer pair RHJ166 & RHJ167 to create pRHJ008.

334 A vector directing the co-expression of *P. gingivalis* ATCC 33277 PorL and PorM in *E. coli* was  
335 produced as follows. pWALDO-sfGFP<sup>28</sup> was digested with BamHI and HindIII and the resulting  
336 fragment coding for the TEV cleavage site, superfolder GFP, and a His<sub>8</sub> tag was ligated into the  
337 corresponding sites in the first multiple cloning site of pCDFDuet-1 (Novagen), yielding plasmid  
338 pRHJ001. A C-terminal Twin-Strep tag-coding sequence was added to the second multi-cloning site of  
339 pRHJ001 by Q5 site-directed mutagenesis (New England Biolabs) using primers RHJ025 and RHJ026,  
340 giving plasmid pRHJ002. The NcoI site in the superfolder GFP-coding sequence was removed by  
341 QuikChange mutagenesis (Agilent) using primers RHJ046 and RHJ047, yielding plasmid pRHJ003.  
342 pRHJ003 was digested with NcoI and XhoI and the resulting fragment ligated into the corresponding  
343 sites of pETDuet-1 to give pRHJ004. *P. gingivalis porL* was amplified from genomic DNA with primers  
344 RHJ051 and RHJ052. The resulting 0.9 kb fragment was inserted between the NcoI and BamHI sites of  
345 pRHJ004 to give pRHJ005. *P. gingivalis porM* was amplified with primers RHJ057 and RHJ058. The  
346 resulting 1.6 kb fragment was inserted between the NdeI and KpnI sites of pRHJ005 to give pRHJ006.

347 A suicide vector to produce an in-frame unmarked deletion of *F. johnsoniae gldL* was produced as  
348 follows. A 2.6 kbp region corresponding to the first 36 bp of *gldL* together with the directly upstream  
349 region was amplified with primers FL309 and FL310. A 2.5 kbp region corresponding to the final 36 bp  
350 of *gldL* together with the directly downstream region was amplified with primers FL311 and FL312.  
351 The vector pYT313<sup>29</sup> was linearized by amplification with primers FL313 and FL314. These three  
352 fragments were then assembled by Gibson cloning to give plasmid pFL89.

353 A suicide vector to produce an in-frame unmarked deletion of *F. johnsoniae gldM* was produced as  
354 follows. A 2.7 kb region corresponding to the first 31 bp of *gldM* together with the directly upstream  
355 region was amplified with primers RHJ148 and RHJ160. A 2.5 kb region corresponding to the final 38  
356 bp of *gldM* together with the directly downstream region was amplified using primers RHJ161 and  
357 RHJ147. The vector pGEM-T was linearized by amplification using primer RHJ144 and RHJ145. These  
358 three fragments were assembled by Gibson cloning to yield pRHJ010. The fragment containing the

359 two *F. johnsoniae* chromosomal regions was then amplified from pRHJ010 with primers RHJ110 and  
360 RHJ113. The resulting 5.2 kb fragment was inserted between the BamHI and KpnI sites of pYT354<sup>29</sup> to  
361 give plasmid pRHJ011.

362 The strategy to generate point mutations in *gldL* involved the use of an intermediate cloning vector  
363 that was produced as follows. A 5.3 kb region including the *gldL* gene sequence and surrounding  
364 chromosomal regions was amplified using primers RHJ146 and RHJ149. pGEM-T was linearized by  
365 amplification with primers RHJ144 and RHJ145. The two fragments were assembled by Gibson cloning  
366 to give pRHJ012. An intermediate cloning vector for generating mutations in *gldM* was produced in an  
367 analogous manner using primers RHJ147 and RHJ148 and yielding plasmid pRHJ013.

368 A suicide vector for the introduction of the *gldL(N10A)* point mutation was produced as follows.  
369 pRHJ012 was linearized by amplification with primers RHJ310 and RHJ311, which introduce the  
370 desired 2 bp point mutation in codon N10. The resulting fragment was re-circularised by *in vivo*  
371 assembly<sup>30</sup>, yielding plasmid pRHJ014. The fragment containing the mutated *gldL* sequence and  
372 adjacent regions was then amplified from pRHJ014 with primers RHJ341 and RHJ342. The vector  
373 pYT354 was linearized by digestion with BamHI and Sall. The two fragments were then assembled by  
374 *in vivo* Gibson cloning to give plasmid pRHJ036. Other point mutations were generated similarly, using  
375 pRHJ012 as a template for mutations in *gldL* and pRHJ013 as a template for mutations in *gldM*, using  
376 the primers described in Supplementary Table 1.

377 A suicide vector to introduce a Twin-Strep tag-coding sequence to the 3' end of *gldL* was produced  
378 as follows. A 2.5-kbp fragment comprising *gldL* together with the directly upstream region was  
379 amplified using primers FL265 and FL266. This fragment was inserted into the SphI and NcoI sites of  
380 pGEM-T easy to generate pFL76. A 2.6-kbp fragment downstream of *gldL* was amplified using primers  
381 FL267 and FL268. This fragment was inserted into the NcoI and Sall sites of pFL76 to generate pFL77.  
382 A fragment encoding a TEV cleavage site followed by a Twin-Strep tag was amplified from pRHJ007

383 using primers RHJ172 and RHJ173. This fragment was inserted between the BamHI and NcoI sites of  
384 pFL77 to give plasmid pRHJ058.

385 A suicide vector for the construction of a *gldL(N10A)-twinstrep* strain was produced as follows. A  
386 fragment including the pGEM-T backbone, the mutation site, and a 2.3 kb region upstream of the  
387 mutation site was amplified from pRHJ012 using primers RHJ311 and RHJ144. A fragment containing  
388 the mutation site together with a 3.2 kb region downstream of the mutation site including the Twin-  
389 Strep tag-encoding sequence was amplified from pRHJ058. These fragments were assembled by  
390 Gibson cloning to give pRHJ059. The fragment containing the mutated *gldL* sequence and adjacent  
391 regions was amplified using primers RHJ341 and RHJ342. pYT354 was linearised by digestion with  
392 BamHI and Sall. These two fragments were assembled by Gibson cloning to give pRHJ081. Suicide  
393 vectors for the construction of other *gldL* point mutations in a *gldL-twinstrep* background were  
394 produced in an analogous manner using the primers described in Supplementary Table 1.

395 To introduce point mutations in *gldM* into a *gldL-twinstrep* background, the mutation site and the  
396 region upstream of the *gldM* point mutation, including the Twin-Strep tag-encoding sequence of the  
397 *gldL* gene, was amplified from pRHJ058. The mutation site and the region downstream of the point  
398 mutation together with the pGEM-T backbone, was amplified from pRHJ013. These fragments were  
399 assembled by Gibson cloning. Primers RHJ342 and RHJ343 were then used to transfer the mutated  
400 *gldM* sequences into pYT354.

401 A suicide vector for the construction of *halotag-sprB* strains was produced by Gibson assembly of  
402 the following four fragments yielding plasmid pAK021: pYT313 linearized with primers AK41 and AK62;  
403 codons 86 to 2647 of *sprB* amplified from the *F. johnsoniae* chromosome with primers AK59 and AK60;  
404 *twinstrep-halotag* amplified from plasmid pET21-ts-halo-RemA97CTD with primers AK37 and AK61; a  
405 genomic fragment extending from the start of *sprD* through to codon 87 of *sprB* was amplified from  
406 the *F. johnsoniae* chromosome with primers AK36 and AK40.

407 For pulse-chase experiments, a plasmid directing production of a tripartite fusion protein consisting  
408 of the *F. johnsoniae* RemA signal sequence, mCherry, and the RemA C-terminal domain under the  
409 control of the *remA* promoter was constructed as follows. A region encompassing 361 nucleotides  
410 immediately upstream of *remA* together with the first 150 nucleotides of *remA* was amplified from  
411 genomic DNA using primers PG001 and PG002, then cloned into the XbaI-SpeI restriction sites of  
412 pCP11<sup>24</sup>. Between the SpeI and SacI sites of the resulting plasmid was inserted the coding sequence  
413 for mCherry with no stop codon amplified from plasmid pRVCHYC-5<sup>31</sup> using primers PG003 and PG004.  
414 Finally a region coding for the 97 C-terminal residues of RemA was amplified with primers PG005 and  
415 PG006 and inserted between the SacI and Sall sites to produce plasmid pCP-remA<sub>us</sub>-mch-CTD97<sub>remA</sub>. A  
416 plasmid coding for the fusion protein with a K1432A substitution in the RemA CTD was made by the  
417 QuikChange mutagenesis (Agilent) using primers PG007 and PG008.

418 Suicide and expression plasmids were introduced into *F. johnsoniae* strains by biparental mating  
419 using *E. coli* S17-1<sup>32</sup> as the donor strain, as previously described<sup>24</sup>. Point mutations in *gldL* were  
420 introduced into the chromosome by using the  $\Delta gldL$  strains FI\_082 or Ak\_205 as the recipient. Point  
421 mutations in *gldM* were introduced into the chromosome by using the  $\Delta gldM$  strains Rhj\_006 or  
422 Ak\_203 as the recipient. Erythromycin resistance was used to select cells with a chromosomally-  
423 integrated suicide plasmid. One of the resulting clones was grown overnight in CYE without antibiotic  
424 to allow for loss of the plasmid backbone, and then plated onto CYE agar containing 5 % sucrose.  
425 Sucrose-resistant colonies were screened by PCR for the presence of the desired chromosomal  
426 modification and then verified by sequencing.

427

#### 428 **Purification of PorLM and GldLM complexes**

429 GldLM' proteins were overproduced from plasmids pRHJ007 and pRHJ008 as follows. Colonies of  
430 BL21(DE3) cells carrying the appropriate plasmid were inoculated into 50 ml 2xYT medium and

431 cultured at 37°C with shaking for 6-8 h. The cells were diluted to OD<sub>600</sub> = 0.02 in TB supplemented with  
432 0.2 % L-rhamnose and then grown at 37°C with shaking for 14 h. Cells were harvested by centrifugation  
433 at 5,000g for 15 min at 4 °C. Cells were washed once in Dulbecco A phosphate buffered saline (PBS)  
434 and stored at -20°C until further use.

435 The frozen cell pellet was resuspended in 3.3 ml per g of cells of Lysis Buffer (PBS supplemented with  
436 1 mM EDTA, 30 µg ml<sup>-1</sup> DNase I, 400 µg ml<sup>-1</sup> lysozyme, and 1 tablet per 100 ml SIGMAFAST™ protease  
437 inhibitor cocktail). The cells were then disrupted using an Emulsiflex homogeniser operated at 15,000  
438 PSI. The resulting lysate was centrifuged at 27,000g for 30 min at 4 °C to remove cellular debris before  
439 the membrane fraction was recovered by centrifugation at 210,000g for 1 h at 4 °C. The membrane  
440 pellets were stored overnight at 4 °C before being resuspended in 8 ml Resuspension Buffer (PBS, 1  
441 mM EDTA) per g membrane. 1 ml 10 % (w/v) lauryl maltose neopentyl glycol (LMNG; Anatrace)  
442 solution was added per g of membranes and the suspension was gently stirred at 4 °C for 2 h. Non-  
443 solubilised material was removed by centrifugation at 75,000g at 10 °C for 30 min. The resulting  
444 supernatant solution was passed through a 5 ml StrepTactin XT cartridge (IBA). The column was  
445 washed with 10 column volumes (CV) StrepTactin Wash Buffer (PBS, 1 mM EDTA, 0.02 % LMNG)  
446 .Protein was eluted in 2 CV StrepTactin Elution Buffer (PBS, 0.02 % LMNG, 1 mM EDTA, 50 mM D-  
447 biotin). The elution fractions were concentrated to 500 µl using a 100 kDa MWCO Amicon Ultra–15  
448 centrifugal filter, and injected on to a Superose 6 10/300 Increase GL size-exclusion chromatography  
449 column (GE Healthcare) equilibrated in 20 mM HEPES pH 7.5, 150 mM NaCl, 0.02 % LMNG. Protein  
450 purity was assessed by SDS-PAGE (Extended Data Figure 2a-b) and GldLM'-containing fractions were  
451 pooled, concentrated using a GE Healthcare 100 kDa MWCO Vivaspin 500 concentrator, and stored at  
452 4°C until use. Protein concentrations were determined spectrophotometrically using A<sub>280nm</sub> 1 = 1 mg  
453 ml<sup>-1</sup>.

454 Production of recombinant PorLM complexes was carried out as follows. An overnight culture of *E.*  
455 *coli* Mt56(DE3)<sup>33</sup> carrying pRHJ006 in 2xYT medium<sup>34</sup> was diluted 100-fold into fresh Terrific Broth

456 medium<sup>35</sup> containing 100 µg ml<sup>-1</sup> ampicillin, and grown at 37°C with shaking to OD<sub>600</sub> = 4.0. Protein  
457 production was then induced by addition of 0.1 mM IPTG and the cells cultured for 15 h at 24°C with  
458 shaking. Cells were harvested and proteins purified as described above for the GldLM' complex, with  
459 the following differences. 1 mM EDTA was omitted from the StrepTactin Elution Buffer. Following  
460 elution from the StrepTactin XT cartridge, the eluted fraction was subsequently passed through a 5 ml  
461 Ni-NTA Superflow cartridge (Qiagen). The column was washed with 10 CV Ni-NTA Wash Buffer 1 (PBS,  
462 0.02 % LMNG, 20 mM imidazole), followed by 10 CV Ni-NTA Wash Buffer 2 (PBS, 0.02 % LMNG, 40 mM  
463 imidazole). Protein was eluted in 1.2 CV Ni-NTA Elution Buffer (PBS, 0.02 % LMNG, 250 mM imidazole).  
464 1mg of TEV-His<sub>6</sub> protease was added per 10 mg eluted protein and the sample dialysed overnight  
465 against Dialysis Buffer (PBS, 0.02 % LMNG) in 3.5 kDa molecular weight cutoff (MWCO) SnakeSkin®  
466 dialysis tubing (Thermo Scientific) at 4°C. The dialysate was centrifuged at 3,220g for 15 min at 4°C.  
467 Imidazole from a 2M stock was added to the supernatant to achieve a final concentration of 20 mM.  
468 The supernatant was passed over a Ni-NTA column. The flowthrough containing PorLM was collected  
469 and then further processed by SEC chromatography as described for the GldLM' purification above  
470 (see Extended Data Figure 1c).

471

#### 472 **Cryo-EM sample preparation and imaging**

473 Four microlitre aliquots of purified GldLM' ( $A_{280\text{nm}} = 0.4\text{-}0.5$ ) or PorLM ( $A_{280\text{nm}} = 0.2\text{-}0.5$ ) complexes  
474 were applied onto glow-discharged holey carbon coated grids (Quantifoil 300 mesh, Au R1.2/1.3),  
475 adsorbed for 10 s, blotted for 2 s at 100% humidity at 4 °C and plunge frozen in liquid ethane using a  
476 Vitrobot Mark IV (FEI).

477 Data were collected in counting mode on a Titan Krios G3 (FEI) operating at 300 kV with a GIF energy  
478 filter (Gatan) and K2 Summit detector (Gatan) using a pixel size of 0.822 Å and a total dose of 48 e<sup>-</sup>/Å<sup>2</sup>  
479 spread over 20 fractions.



480

## 481 **Cryo-EM data processing**

482 Motion correction and dose weighting were performed using MotionCor implemented in Relion  
483 3.0<sup>36</sup>. Contrast transfer functions were calculated using CTFFIND4<sup>37</sup>. Particles were picked in Simple<sup>38</sup>  
484 and processed in Relion 3.0<sup>36</sup>. Gold standard Fourier shell correlations using the 0.143 criterion and  
485 local resolution estimations were calculated within Relion<sup>36</sup> (Extended Data Fig. 3).

486 3,284,887 GldLM' particles were extracted from 9,858 movies in 256 x 256 pixel boxes and subjected  
487 to a round of reference-free 2D classification, from which 531,515 particles were recovered. An *ab*  
488 *initio* initial model was generated from a subset of 500 particles using SIMPLE<sup>38</sup>. This model was low-  
489 pass filtered to 60 Å and used as reference for 3D classification (4 classes, 7.5° sampling) against a  
490 335,887 particle subset followed by refinement which yielded a 6.8 Å map. This map was used as initial  
491 reference (40 Å low-pass filtered) and mask for 3D classification (3 classes, 15 iterations at 7.5°  
492 sampling then 10 iterations at 3.75° sampling) against the entire dataset and further refined to 4.0 Å.  
493 Bayesian particle polishing followed by another round of 3D classification with local angular searches  
494 yielded a 3.9 Å map from 119,230 particles after refinement.

495 PorLM particles (1,133,336) were extracted from 14,135 movies in 324 x 324 boxes and subjected to  
496 two rounds of reference-free 2D classification, from which 495,572 particles were recovered. After  
497 recentering and reextraction in a smaller box (256 x 256), particles were subjected to 3D classification  
498 (4 classes, 15 iterations at 7.5° sampling then 10 iterations at 3.75° sampling) against a 40 Å low-pass  
499 filtered GldLM map. Selected particles (199,929) were refined against the corresponding map (low-  
500 pass filtered to 40 Å) first using a soft spherical mask of 140 Å and then with a 180 Å mask. Recentered  
501 particles, now in a 324 x 324 pixel box, were refined using a spherical mask of 400 Å. Particle re-  
502 centering and re-extraction in 480 x 480 pixel boxes followed by refinement using local searches with  
503 a mask covering the stalk and base of PorLM yielded an 8.6 Å map.

504

## 505 **GldLM model building and refinement**

506 The first periplasmic domains (residues 36-224) of the *F. johnsoniae* GldM crystal structure<sup>17</sup> (PDB  
507 6ey4) were rigid body fitted into the GldLM' cryo-EM density map using Coot<sup>39</sup>. All other residues  
508 were built *de novo* using Coot<sup>39</sup> guided by TMH predictions from TMHMM<sup>40</sup>. Multiple rounds of  
509 rebuilding in both the globally sharpened and local-resolution filtered maps and real-space refinement  
510 in Phenix<sup>41</sup> using secondary structure, rotamer, and Ramachandran restraints yielded the final model  
511 described in Table 1. Validation was performed using Molprobit<sup>42</sup>. Conservation analysis was carried  
512 out using the Consurf server<sup>43</sup>.

513 The GldLM' model and the C-terminal periplasmic domains (residues 225-515) of PorM (PDB 6ey5)  
514 were docked into the PorLM map using Chimera<sup>44</sup>. Figures were prepared using UCSF ChimeraX<sup>44</sup> and  
515 Pymol (The PyMOL Molecular Graphics System, Version 2.0 Schrödinger, LLC).

516

## 517 **Antibody production**

518 To produce GldL antibodies a 462-bp fragment of *gldL* spanning the cytoplasmic domain (GldL<sub>C</sub>,  
519 residues 66-215) was amplified from genomic DNA using primers FL125 and FL126. This fragment was  
520 inserted between the NdeI and BamHI sites of pWALDO-sfGFPd. The resulting vector, pFL43, produces  
521 a GldL<sub>C</sub>-TEV-sfGFP-His<sub>8</sub> fusion protein.

522 To produce GldM antibodies a 1305-bp fragment of *gldM* spanning the periplasmic domain (GldM<sub>P</sub>,  
523 residues 78-513) was amplified from genomic DNA using primers FL128 and FL129. This fragment was  
524 inserted between the NdeI and BamHI sites of pWALDO-sfGFPd. The resulting vector, pFL44, produces  
525 a GldM<sub>P</sub>-TEV-sfGFP-His<sub>8</sub> fusion protein.

526 *E. coli* BL21 Star (DE3) cells containing either pFL43 or pFL44 were grown in 1.2 l LB medium at 37  
527 °C to OD<sub>600</sub> = 0.5 mid-log phase and protein expression induced by addition of 400 µM IPTG. The cells  
528 were then cultured for an additional 5 h at 20 °C. Cells were harvested by centrifugation at 6,000g for  
529 25 min and stored at -20°C until further use. All purification steps were carried out at 4°C. Cell pellets  
530 were resuspended in PBS containing 30 µg ml<sup>-1</sup> DNase I, 400 µg ml<sup>-1</sup> lysozyme and 1 mM  
531 phenylmethylsulfonyl fluoride at a ratio of 5 ml of buffer to 1 g of cell pellet. Cells were incubated on  
532 ice for 30 min before being lysed by two passages through a TS series 1.1kW cell disruptor (Constant  
533 System Ltd) at 30,000 PSI. Cell debris was removed by centrifugation at 20,000g for 25 min. The  
534 supernatant was then clarified using a 0.22 µm syringe filter unit (Millipore) and circulated through a  
535 5 ml HisTrap HP column (GE Healthcare) for 2 h. The column was washed with 10 CV of PBS containing  
536 10 mM imidazole and bound proteins were eluted with a 10-500 mM linear imidazole in 10 CV of PBS.  
537 Peak fractions were collected, diluted with an equal volume of PBS, pH 8.0, containing 0.5 mM EDTA,  
538 and dialyzed for 1 h at 4 °C against 1 l of the same buffer. TEV-His<sub>6</sub> protease was added to the pooled  
539 fractions at a 1 to 100 protein mass ratio and dialysis was continued overnight at 4°C against 1 l of PBS  
540 containing 0.5 mM EDTA and 1 mM DTT. The cleavage reaction was then circulated through a HisTrap  
541 HP column (GE Healthcare) for 2 h and the flowthrough collected. This preparation was subjected to  
542 SDS-PAGE followed by Coomassie Blue staining. The band corresponding to the recombinant protein  
543 domain was excised from the gel and used by Davids Biotechnologie GmbH (Regensburg, DE) to raise  
544 polyclonal antibodies.

545

#### 546 **Preparation of samples for whole cell immunoblotting analysis of GldL and GldM**

547 Strains were grown in CYE medium for 22 h, reaching OD<sub>600</sub> = 5.5-6.5. The cells in 1 ml samples of  
548 the culture were harvested by centrifugation at 9,000g for 10 min, resuspended and washed once in  
549 1 ml PBS, and finally resuspended in PBS to an OD<sub>600</sub> = 5.0. These samples were then diluted ten-fold

550 in PBS, subject to SDS-PAGE, and analysed by immunoblotting with Gld<sub>Lc</sub> or Gld<sub>Mp</sub> primary antibodies,  
551 and anti-Rabbit IgG HRP Conjugate (Promega) secondary antibodies.

552

### 553 **Measurement of chitinase secretion**

554 Cells were grown in MM for 15.5 h, reaching OD<sub>600</sub> = 0.75-1.25. 5 ml culture samples were subject to  
555 centrifugation at 3,720g for 10 min to remove cells. Chitinase activity in the resulting supernatants  
556 was determined using a fluorometric chitinase assay kit (Sigma) with the synthetic substrate 4-  
557 methylumbelliferyl N,N'-diacetyl-β-D-chitobioside. Statistical analysis of the results was carried out  
558 using GraphPad Prism version 7.03 for Windows (GraphPad Software, La Jolla California USA,  
559 [www.graphpad.com](http://www.graphpad.com)). Normality of datasets was assessed by the Kolmogorov-Smirnov test. Normally  
560 distributed datasets were compared to the parental strain using one-way ANOVA followed by Dunn's  
561 multiple comparison test. Non-normally distributed datasets were compared to WT using a Kruskal-  
562 Wallis test followed by Dunnett's multiple comparisons test.

563

### 564 **Measurement of gliding motility on agar**

565 Strains were grown overnight in PY2 medium, washed once in PY2 medium, then resuspended in  
566 PY2 medium to an OD<sub>600</sub> = 0.1. A 2 μl sample was then spotted on PY2 agar plates. Plates were  
567 incubated at 25°C for 48 h before imaging with a Zeiss AXIO Zoom MRm CCD camera and Zeiss  
568 software (ZenPro 2012, version 1.1.1.0).

569

### 570 **Microscopic observation of gliding motility on glass**

571 Strains were grown overnight in MM, diluted 40-fold into fresh medium and grown for 5 h at 25°C  
572 with 50 rpm shaking. An aliquot of the culture was introduced to a tunnel slide, incubated for 5 min,

573 washed twice with 100  $\mu$ l fresh medium and imaged in phase contrast on a Zeiss Axiovert 200  
574 microscope fitted with a Photometrics Coolsnap HQ Camera using a 63x 1.4NA Plan-Apochromat lens.  
575 Tif images were captured using Metamorph software (Molecular Devices) and then modified in Image  
576 J<sup>45</sup>. Videos were collected at 20 frames per second with a 15 ms exposure time using 2x2 binning.

577

### 578 **Single molecule fluorescence imaging of SprB mobility**

579 Strains expressing the Halo Tag-SprB fusion were grown overnight in CYE medium, diluted 40-fold  
580 into fresh medium and grown at 30°C with 180 rpm shaking to early stationary phase ( $OD_{600} = 0.8-1.0$ ).  
581 The HaloTag-SprB fusion was labelled by mixing 1 ml of this culture with 1  $\mu$ l of a 10  $\mu$ M stock solution  
582 of PA Janelia Fluor 646 HaloTag ligand<sup>46,47</sup> in dimethyl sulfoxide (DMSO) and cultured for a further 30  
583 min. The cells were harvested at 9000g for 3 min, washed 3 times with 650  $\mu$ l PY2 medium, and then  
584 2  $\mu$ l cells were spotted onto a 1 % agarose pad containing 50 % PY2 medium.

585 Fluorescence images were acquired at 25°C using a Nanoimager (Oxford Nanoimaging) equipped  
586 with 405nm and 640nm 1W DPSS lasers. Optical magnification was provided by a 100x oil-immersion  
587 objective (Olympus, numerical aperture (NA) 1.4) and images were acquired using an ORCA-Flash4.0  
588 V3 CMOS camera (Hamamatsu). Cells were imaged using a 20 ms exposure time, with the 405 nm  
589 photoactivation laser at 10% power and the 640 nm measurement laser at 20% power. Different  
590 strains were imaged at different strobing frequencies to accommodate the large differences in adhesin  
591 velocities between the different *gldLM* mutants. Specifically, strain Ak\_73 (wild type *gldLM*) was  
592 imaged without strobing, strains Ak\_196 (*gldL(Y13A)*), Ak\_197 (*gldL(H30A)*), and Ak\_199 (*gldM(Y17F)*)  
593 were imaged with a 60 ms dark interval, whilst Ak\_198 (*gldL(K27A)*) was imaged with a 480 ms dark  
594 interval.

595 Fluorescent foci were tracked using the Nanoimager software. Helical tracks were exported as csv  
596 files and the average frame to frame displacement calculated. The resulting data were analysed using

597 GraphPad Prism version 7.03 for Windows (GraphPad Software, La Jolla California USA,  
598 [www.graphpad.com](http://www.graphpad.com)), using a Kruskal-Wallis test followed by Dunn's multiple comparisons test. The  
599 data were plotted using Prism.

600

#### 601 **Pulse-chase assay of Type 9 protein export**

602 The required *F. johnsoniae* strain was inoculated from a freshly-streaked plate into 5 ml SDY medium  
603 (SD medium<sup>48</sup> containing 0.01% yeast extract) and cultured for 24 h at 30 °C with shaking. The cultures  
604 were harvested by centrifugation, resuspended in the same volume of SDAC (SD medium with 0.04  
605 mg ml<sup>-1</sup> of all L-amino acids except methionine plus 1.5% CYE medium), then diluted one in five in  
606 fresh SDAC. These cultures were grown for 2.5 h at 30 °C and 30 rpm shaking. 40 µCi ml<sup>-1</sup> EasyTag L-  
607 [<sup>35</sup>S]-methionine (Perkin-Elmer) was then added and growth was continued for 30 min. Cultures were  
608 harvested by centrifugation and resuspended in the same volume of unlabelled SDAC containing 0.4  
609 mg ml<sup>-1</sup> unlabelled L-methionine, and where required, either 10 µM carbonyl cyanide *m*-chlorophenyl  
610 hydrazone (CCCP) or 10 mM sodium arsenate. The cultures were further incubated with shaking at 30  
611 °C. At appropriate time points 1 ml samples were removed from each culture and the cells pelleted by  
612 centrifugation. Cells were resuspended in RIPA buffer (10 mM Tris-HCl pH 7.5, 150 mM NaCl, 0.5 mM  
613 EDTA, 0.1% SDS, 1% Triton X-100, 1% deoxycholate, 0.09% sodium azide). Both the resuspended  
614 pellets and culture supernatants stored at 4 °C until the end of the time course, at which point all  
615 samples were incubated for a further 1 hour at 4 °C. The cell pellet samples were then diluted with  
616 1.5 volumes of RND buffer (10 mM Tris-HCl pH 7.5, 150 mM NaCl, 0.5 mM EDTA), centrifuged for 10  
617 min at 13,000*g* and the supernatant retained. Both these cell pellet-derived samples and the culture  
618 supernatant samples were incubated with 10 µl RFP-trap MA (Chromotek) for one hour at 24 °C with  
619 constant mixing. The RFP-trap resin was isolated on a magnetic rack and washed with 2 x 800 µl RND  
620 buffer, then resuspended in SDS-PAGE sample buffer. Samples were separated by SDS-PAGE, and the  
621 resulting gels fixed, dried and exposed to radiographic film (GE Healthcare).

622

### 623 **Measurement of cellular ATP levels**

624 Strains were cultured as for the pulse-chase experiments to the point at which the cells were  
625 transferred to SDAC medium. The cells were then incubated for 3 h at 30 °C and 110 rpm. 0.5 ml  
626 samples were treated with 10 µM CCCP, or 10 mM sodium arsenate, or left untreated for 20 min at  
627 24 °C. Cellular ATP levels were then determined using an ATP Bioluminescence Assay Kit HS II (Roche).  
628 Cells were diluted to OD<sub>600</sub> = 0.1 with dilution buffer from the kit. 200 µl aliquots of diluted cells were  
629 combined with 200 µl lysis buffer from the kit and incubated at 70 °C for 5 min. Lysates were  
630 immediately transferred to ice and then clarified by centrifugation. The ATP content in the lysates was  
631 determined according to the kit manufacturer's instructions and using a CLARIOstar Plus plate reader  
632 (BMG Labtech). Statistical analysis of cellular ATP levels was carried out using R<sup>49</sup>.

633

### 634 **References**

- 635 1 Nicholls, D. G. & Ferguson, S. J. Bioenergetics 4. *Bioenergetics* **4**, 1-419 (2013).  
636 2 Guo, H. & Rubinstein, J. L. Cryo-EM of ATP synthases. *Curr Opin Struct Biol* **52**, 71-79,  
637 doi:10.1016/j.sbi.2018.08.005 (2018).  
638 3 Walker, J. E. The ATP synthase: the understood, the uncertain and the unknown. *Biochem Soc*  
639 *Trans* **41**, 1-16, doi:10.1042/BST20110773 (2013).  
640 4 Sowa, Y. & Berry, R. M. Bacterial flagellar motor. *Q Rev Biophys* **41**, 103-132,  
641 doi:10.1017/S0033583508004691 (2008).  
642 5 Kojima, S. Dynamism and regulation of the stator, the energy conversion complex of the  
643 bacterial flagellar motor. *Curr Opin Microbiol* **28**, 66-71, doi:10.1016/j.mib.2015.07.015  
644 (2015).  
645 6 Celia, H. *et al.* Cryo-EM structure of the bacterial Ton motor subcomplex ExbB-ExbD provides  
646 information on structure and stoichiometry. *Commun Biol* **2**, 358, doi:10.1038/s42003-019-  
647 0604-2 (2019).  
648 7 Cascales, E., Lloubes, R. & Sturgis, J. N. The TolQ-TolR proteins energize TolA and share  
649 homologies with the flagellar motor proteins MotA-MotB. *Mol Microbiol* **42**, 795-807,  
650 doi:10.1046/j.1365-2958.2001.02673.x (2001).  
651 8 McBride, M. J. Bacteroidetes Gliding Motility and the Type IX Secretion System. *Microbiol*  
652 *Spectr* **7**, doi:10.1128/microbiolspec.PSIB-0002-2018 (2019).  
653 9 Nakane, D., Sato, K., Wada, H., McBride, M. J. & Nakayama, K. Helical flow of surface protein  
654 required for bacterial gliding motility. *Proc Natl Acad Sci U S A* **110**, 11145-11150,  
655 doi:10.1073/pnas.1219753110 (2013).

- 656 10 Ridgway, H. F. Source of energy for gliding motility in *Flexibacter polymorphus*: effects of  
657 metabolic and respiratory inhibitors on gliding movement. *J Bacteriol* **131**, 544-556 (1977).
- 658 11 Shrivastava, A., Lele, P. P. & Berg, H. C. A rotary motor drives *Flavobacterium* gliding. *Curr Biol*  
659 **25**, 338-341, doi:10.1016/j.cub.2014.11.045 (2015).
- 660 12 Shrivastava, A., Roland, T. & Berg, H. C. The Screw-Like Movement of a Gliding Bacterium Is  
661 Powered by Spiral Motion of Cell-Surface Adhesins. *Biophys J* **111**, 1008-1013,  
662 doi:10.1016/j.bpj.2016.07.043 (2016).
- 663 13 Nelson, S. S., Bollampalli, S. & McBride, M. J. SprB is a cell surface component of the  
664 *Flavobacterium johnsoniae* gliding motility machinery. *J Bacteriol* **190**, 2851-2857,  
665 doi:10.1128/JB.01904-07 (2008).
- 666 14 Shrivastava, A. & Berg, H. C. A molecular rack and pinion actuates a cell-surface adhesin and  
667 enables bacterial gliding motility. *Science Advances* **6**, 1-6, doi:10.1126/sciadv.aay6616 (2020).
- 668 15 Shrivastava, A., Johnston, J. J., van Baaren, J. M. & McBride, M. J. *Flavobacterium johnsoniae*  
669 GldK, GldL, GldM, and SprA are required for secretion of the cell surface gliding motility  
670 adhesins SprB and RemA. *J Bacteriol* **195**, 3201-3212, doi:10.1128/JB.00333-13 (2013).
- 671 16 Vincent, M. S. *et al.* Characterization of the *Porphyromonas gingivalis* Type IX Secretion Trans-  
672 envelope PorKLMNP Core Complex. *J Biol Chem* **292**, 3252-3261,  
673 doi:10.1074/jbc.M116.765081 (2017).
- 674 17 Leone, P. *et al.* Type IX secretion system PorM and gliding machinery GldM form arches  
675 spanning the periplasmic space. *Nat Commun* **9**, 429, doi:10.1038/s41467-017-02784-7  
676 (2018).
- 677 18 Gorasia, D. G. *et al.* Structural Insights into the PorK and PorN Components of the  
678 *Porphyromonas gingivalis* Type IX Secretion System. *PLoS Pathog* **12**, e1005820,  
679 doi:10.1371/journal.ppat.1005820 (2016).
- 680 19 Sato, K. *et al.* A protein secretion system linked to bacteroidete gliding motility and  
681 pathogenesis. *Proc Natl Acad Sci U S A* **107**, 276-281, doi:10.1073/pnas.0912010107 (2010).
- 682 20 Lauber, F., Deme, J. C., Lea, S. M. & Berks, B. C. Type 9 secretion system structures reveal a  
683 new protein transport mechanism. *Nature* **564**, 77-82, doi:10.1038/s41586-018-0693-y  
684 (2018).
- 685 21 Veith, P. D., Glew, M. D., Gorasia, D. G. & Reynolds, E. C. Type IX secretion: the generation of  
686 bacterial cell surface coatings involved in virulence, gliding motility and the degradation of  
687 complex biopolymers. *Mol Microbiol* **106**, 35-53, doi:10.1111/mmi.13752 (2017).
- 688 22 Lasica, A. M., Ksiazek, M., Madej, M. & Potempa, J. The Type IX Secretion System (T9SS):  
689 Highlights and Recent Insights into Its Structure and Function. *Front Cell Infect Microbiol* **7**,  
690 215, doi:10.3389/fcimb.2017.00215 (2017).
- 691 23 von Heijne, G. & Gavel, Y. Topogenic signals in integral membrane proteins. *Eur J Biochem* **174**,  
692 671-678, doi:10.1111/j.1432-1033.1988.tb14150.x (1988).
- 693 24 McBride, M. J. & Kempf, M. J. Development of techniques for the genetic manipulation of the  
694 gliding bacterium *Cytophaga johnsonae*. *J Bacteriol* **178**, 583-590 (1996).
- 695 25 Liu, J., McBride, M. J. & Subramaniam, S. Cell surface filaments of the gliding bacterium  
696 *Flavobacterium johnsoniae* revealed by cryo-electron tomography. *J Bacteriol* **189**, 7503-  
697 7506, doi:10.1128/JB.00957-07 (2007).
- 698 26 Agarwal, S., Hunnicutt, D. W. & McBride, M. J. Cloning and characterization of the  
699 *Flavobacterium johnsoniae* (*Cytophaga johnsonae*) gliding motility gene, *gldA*. *Proc Natl Acad*  
700 *Sci U S A* **94**, 12139-12144 (1997).
- 701 27 Dietsche, T. *et al.* Structural and Functional Characterization of the Bacterial Type III Secretion  
702 Export Apparatus. *PLoS Pathog* **12**, e1006071, doi:10.1371/journal.ppat.1006071 (2016).
- 703 28 Drew, D., Lerch, M., Kunji, E., Slotboom, D. J. & de Gier, J. W. Optimization of membrane  
704 protein overexpression and purification using GFP fusions. *Nat Methods* **3**, 303-313,  
705 doi:10.1038/nmeth0406-303 (2006).



- 706 29 Zhu, Y. *et al.* Genetic analyses unravel the crucial role of a horizontally acquired alginate lyase  
707 for brown algal biomass degradation by *Zobellia galactanivorans*. *Environ Microbiol* **19**, 2164-  
708 2181, doi:10.1111/1462-2920.13699 (2017).
- 709 30 Jacobus, A. P. & Gross, J. Optimal cloning of PCR fragments by homologous recombination in  
710 *Escherichia coli*. *PLoS one* **10**, e0119221, doi:10.1371/journal.pone.0119221 (2015).
- 711 31 Thanbichler, M., Iniesta, A. A. & Shapiro, L. A comprehensive set of plasmids for vanillate- and  
712 xylose-inducible gene expression in *Caulobacter crescentus*. *Nucleic Acids Res* **35**, e137,  
713 doi:10.1093/nar/gkm818 (2007).
- 714 32 Simon, R., Prierer, U. & Puhler, A. A Broad Host Range Mobilization System for In vivo Genetic-  
715 Engineering - Transposon Mutagenesis in Gram-Negative Bacteria. *Bio-Technology* **1**, 784-791,  
716 doi:DOI 10.1038/nbt1183-784 (1983).
- 717 33 Baumgarten, T. *et al.* Isolation and characterization of the *E. coli* membrane protein  
718 production strain Mutant56(DE3). *Sci Rep* **7**, 45089, doi:10.1038/srep45089 (2017).
- 719 34 Miller, J. *Experiments in Molecular Genetics*. (Cold Spring Harbor, 1972).
- 720 35 Tartof, K. D. a. H., C.A. . Improved media for growing plasmid and cosmid clones. *Focus*® **9**, 12  
721 (1987).
- 722 36 Zivanov, J., Nakane, T. & Scheres, S. H. W. A Bayesian approach to beam-induced motion  
723 correction in cryo-EM single-particle analysis. *IUCr* **6**, 5-17, doi:10.1107/S205225251801463X  
724 (2019).
- 725 37 Rohou, A. & Grigorieff, N. CTFIND4: Fast and accurate defocus estimation from electron  
726 micrographs. *J Struct Biol* **192**, 216-221, doi:10.1016/j.jsb.2015.08.008 (2015).
- 727 38 Reboul, C. F., Eager, M., Elmlund, D. & Elmlund, H. Single-particle cryo-EM-Improved ab initio  
728 3D reconstruction with SIMPLE/PRIME. *Protein Sci* **27**, 51-61, doi:10.1002/pro.3266 (2018).
- 729 39 Emsley, P., Lohkamp, B., Scott, W. G. & Cowtan, K. Features and development of Coot. *Acta*  
730 *Crystallogr D Biol Crystallogr* **66**, 486-501, doi:10.1107/S0907444910007493 (2010).
- 731 40 Krogh, A., Larsson, B., von Heijne, G. & Sonnhammer, E. L. Predicting transmembrane protein  
732 topology with a hidden Markov model: application to complete genomes. *J Mol Biol* **305**, 567-  
733 580, doi:10.1006/jmbi.2000.4315 (2001).
- 734 41 Afonine, P. V. *et al.* Real-space refinement in PHENIX for cryo-EM and crystallography. *Acta*  
735 *Crystallogr D Struct Biol* **74**, 531-544, doi:10.1107/S2059798318006551 (2018).
- 736 42 Williams, C. J. *et al.* MolProbity: More and better reference data for improved all-atom  
737 structure validation. *Protein Sci* **27**, 293-315, doi:10.1002/pro.3330 (2018).
- 738 43 Ashkenazy, H. *et al.* ConSurf 2016: an improved methodology to estimate and visualize  
739 evolutionary conservation in macromolecules. *Nucleic Acids Res* **44**, W344-350,  
740 doi:10.1093/nar/gkw408 (2016).
- 741 44 Goddard, T. D. *et al.* UCSF ChimeraX: Meeting modern challenges in visualization and analysis.  
742 *Protein Sci* **27**, 14-25, doi:10.1002/pro.3235 (2018).
- 743 45 Schneider, C. A., Rasband, W. S. & Eliceiri, K. W. NIH Image to ImageJ: 25 years of image  
744 analysis. *Nature methods* **9**, 671-675, doi:10.1038/nmeth.2089 (2012).
- 745 46 Grimm, J. B., Brown, T. A., English, B. P., Lionnet, T. & Lavis, L. D. Synthesis of Janelia Fluor  
746 HaloTag and SNAP-Tag Ligands and Their Use in Cellular Imaging Experiments. *Methods Mol*  
747 *Biol* **1663**, 179-188, doi:10.1007/978-1-4939-7265-4\_15 (2017).
- 748 47 Grimm, J. B. *et al.* Bright photoactivatable fluorophores for single-molecule imaging. *Nature*  
749 *methods* **13**, 985-988, doi:10.1038/nmeth.4034 (2016).
- 750 48 Chang, L. Y. E. & Pate, J. L. Nutritional-Requirements of *Cytophaga-Johnsonae* and Some of Its  
751 Auxotrophic Mutants. *Curr Microbiol* **5**, 235-240 (1981).
- 752 49 R: A language and environment for statistical computing (R Foundation for Statistical  
753 Computing, Vienna, Austria, 2017).
- 754 50 Kulkarni, S. S., Zhu, Y., Brendel, C. J. & McBride, M. J. Diverse C-Terminal Sequences Involved  
755 in *Flavobacterium johnsoniae* Protein Secretion. *J Bacteriol* **199**, doi:10.1128/JB.00884-16  
756 (2017).

- 757 51 Nijeholt, J. A. L. A. & Driessen, A. J. M. The bacterial Sec-translocase: structure and mechanism.  
758 *Philos T R Soc B* **367**, 1016-1028, doi:10.1098/rstb.2011.0201 (2012).
- 759 52 Kamisetty, H., Ovchinnikov, S. & Baker, D. Assessing the utility of coevolution-based residue-  
760 residue contact predictions in a sequence- and structure-rich era. *Proc Natl Acad Sci U S A* **110**,  
761 15674-15679, doi:10.1073/pnas.1314045110 (2013).
- 762 53 Krissinel, E. & Henrick, K. Inference of macromolecular assemblies from crystalline state.  
763 *Journal of Molecular Biology* **372**, 774-797 (2007).
- 764 54 McBride, M. J. & Braun, T. F. GldI is a lipoprotein that is required for *Flavobacterium*  
765 *johnsoniae* gliding motility and chitin utilization. *J Bacteriol* **186**, 2295-2302 (2004).

766

767

768 **Data availability**

769 The cryo-EM volumes have been deposited in the Electron Microscopy Data Bank (EMDB) with  
770 accession codes EMD-10893 and EMD-10894, and the coordinates have been deposited in the  
771 Protein Data Bank (PDB) with accession code 6YS8. Source Data are available with the online version  
772 of the paper.

773 **Extended data figures and tables**

774

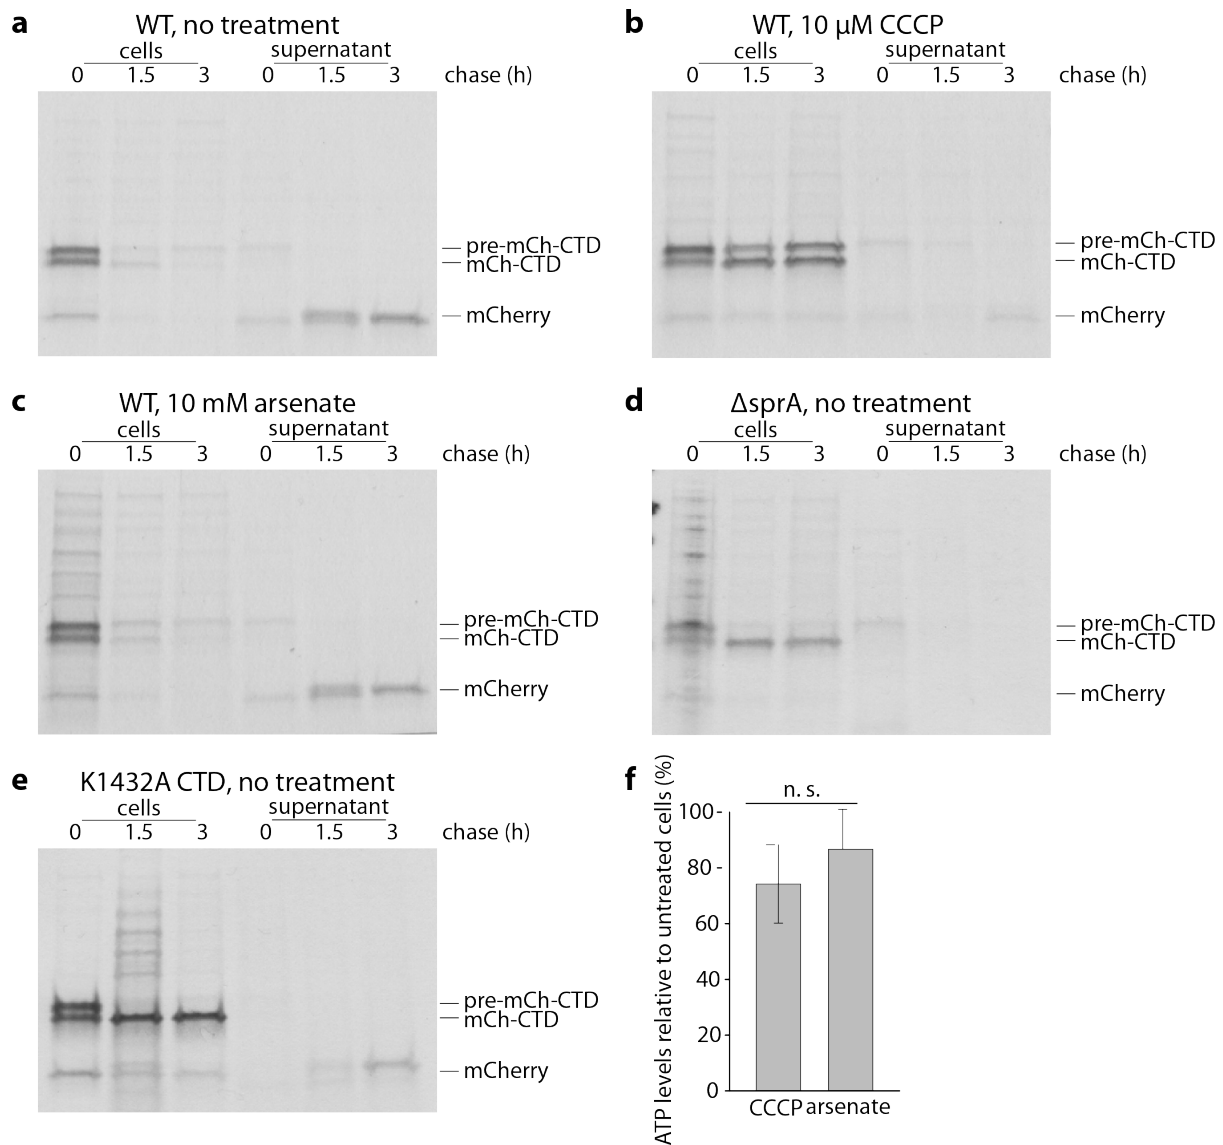

775

776 **Extended Data Fig. 1 | Protein export by the T9SS requires the protonmotive force**

777 **a-e**, Pulse-chase analysis of the export of a signal sequence-mCherry-CTD (T9SS-targeting C-terminal  
778 domain) fusion protein by the *F. johnsoniae* T9SS. Cells were labelled with [<sup>35</sup>S]methionine for 30 min,  
779 chased with cold methionine for 0 to 3 h (as indicated), and then separated into cell and supernatant  
780 (culture medium) fractions. Fusion protein was enriched by anti-mCherry immunoprecipitation and  
781 then analysed by SDS-PAGE and autoradiography. Similar data were obtained for two biological  
782 repeats. Pre-mCh-CTD, full length fusion protein; mCh-CTD, fusion protein from which the signal  
783 sequence has been removed; mCh, mCherry from which both the signal sequence and CTD have been  
784 removed. Export of the fusion protein was blocked by treatment with the protonophore carbonyl  
785 cyanide m-chlorophenyl hydrazone (CCCPCarsenate, panel **b**) but not by the ATP synthase inhibitor arsenate  
786 (panel, **c**). Control experiments confirm that the observed export of the mCherry fusion requires the  
787 T9SS ( $\Delta$ sprA strain FI\_004<sup>20</sup>, panel **d**) and a functional CTD (non-functional K1432A CTD<sup>50</sup>, panel **e**).  
788 Note, that transport of the fusion across the cytoplasmic membrane by the Sec apparatus is also

789 inhibited by CCCP (panel **c**) in agreement with previous observations in *Escherichia coli*<sup>51</sup>. **f**,  
790 Measurements of whole cell ATP levels confirm that the effects of CCCP on protein transport are not  
791 an indirect effect of decreased cellular ATP. Bioluminescence readings from treated cells were  
792 normalised to those of untreated cells from the same starting culture. CCCP and arsenate  
793 concentrations were as in panels **b**) and **c**). Error bars represent 1 SD (10 biological repeats). The  
794 datasets were tested for normality using the Shapiro-Wilk test and also inspected visually using Q-Q  
795 plots. The Bartlett test was used to establish that the variances of the two datasets were likely  
796 homogeneous. An independent two-tailed t-test indicated that the ATP levels in CCCP- and arsenate-  
797 treated cells were not significantly different (n.s.) (t-value = -1.9619, df = 17.994, p-value =  
798 0.06543>0.05) even though only CCCP treatment blocks T9SS protein export.  
799

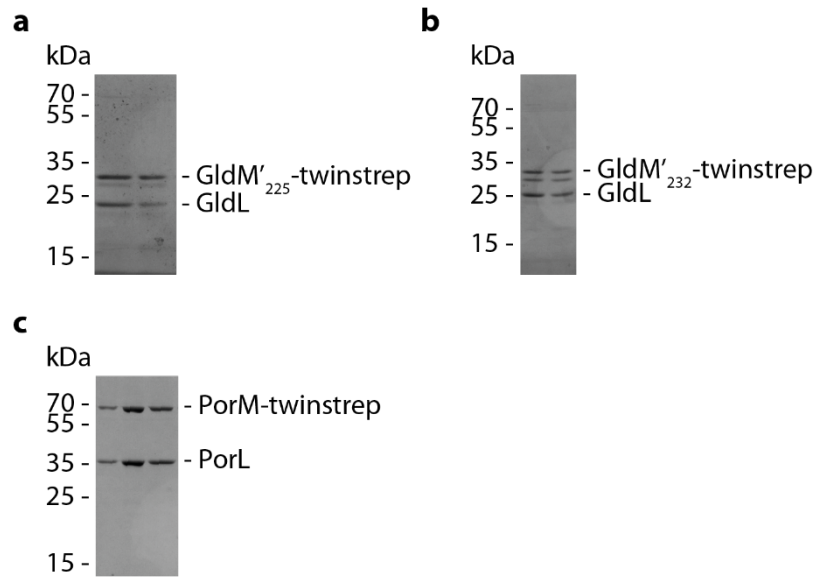

800

801

802 **Extended Data Fig. 2 | Purification of the GldLM and PorLM complexes.**

803

804 Coomassie Blue-stained SDS-PAGE gels of the (a) GldLM<sub>225</sub>(produced from pRHJ007), (b) GldLM<sub>232</sub>  
805 (produced from pRHJ008), and (c) PorLM (produced from pRHJ006) complexes used for cryo-EM  
806 structure determination. In each case the size exclusion column fractions that were pooled to make  
807 the cryo-EM grids are shown.

808

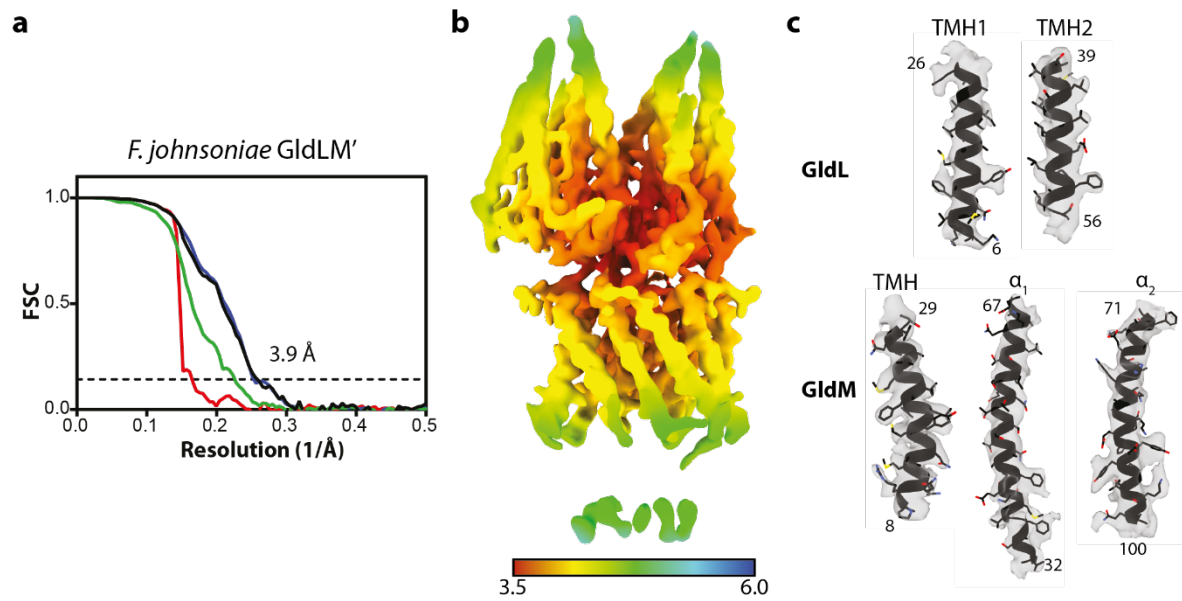

809

810

811 **Extended Data Fig. 3 | Cryo-EM map quality and resolution estimates.**

812 **a** Fourier Shell Correlation (FSC) plot for the GldLM' structure. The resolution at the gold-standard  
813 cutoff (FSC = 0.143) is indicated by the dashed line. Curves: Red, phase-randomized; Green, unmasked;  
814 blue, masked; black, MTF-corrected **b** Local resolution estimates (in Å) for the sharpened GldLM' map.  
815 **c** Representative modelled densities.

816

817

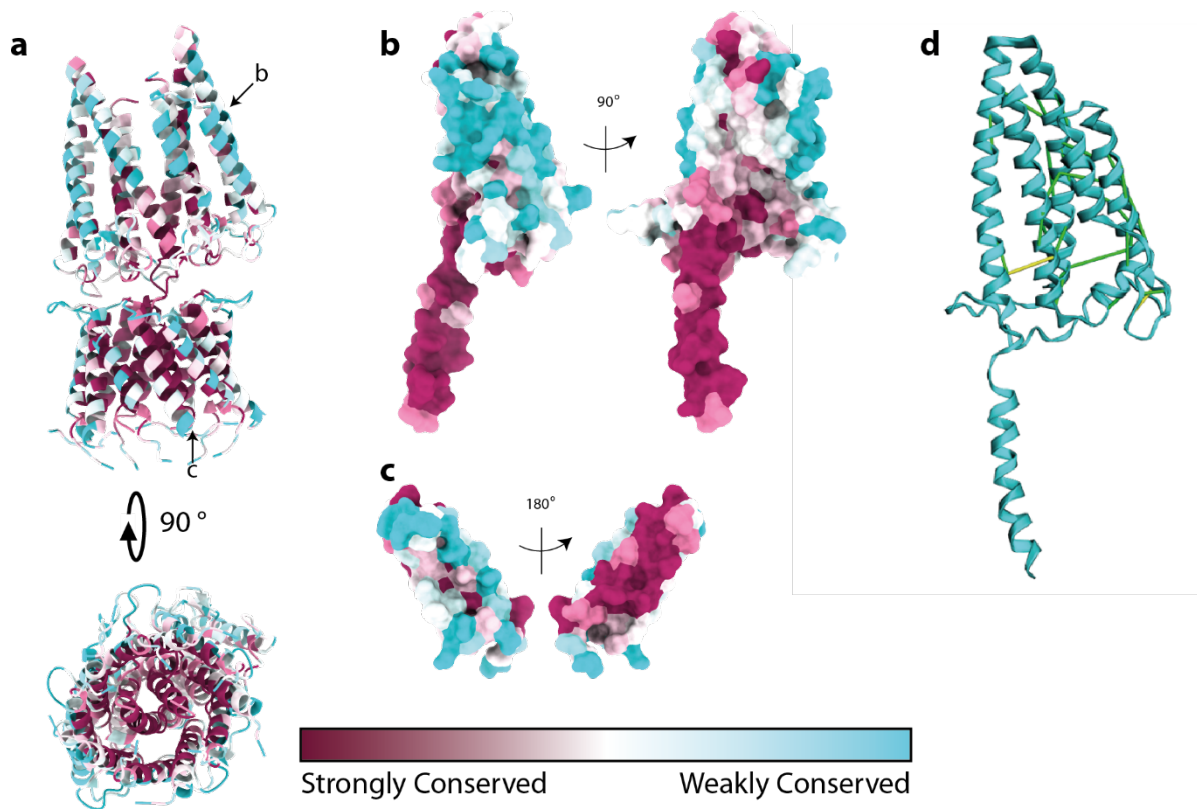

818

819

820 **Extended Data Fig. 4 | Conservation analysis of the GldLM complex.**

821

822 **a-c**, Sequence conservation assessed using ConSurf<sup>43</sup>. **a**, The whole complex in cartoon representation.  
823 The chains shown individually in **b** and **c** are indicated with black arrows. **b**, GldM (chain B) and **c**, GldL  
824 (chain F) in surface representation. The left hand panels show the chains in the same orientation as  
825 the upper panel of **a**. **d**, Covarying residue pairs in the first periplasmic domain of GldM identified  
826 using the Gremlin server<sup>52</sup>. The highest-scoring pairs (score cut-off 1.63) are shown on the structure  
827 of the GldLM' complex presented here. Contacts with a minimum atom-atom distance of <5 Å are  
828 shown in green, and 5-10 Å in yellow. Note, that no high-scoring intermolecular pairs were observed.  
829

830

831



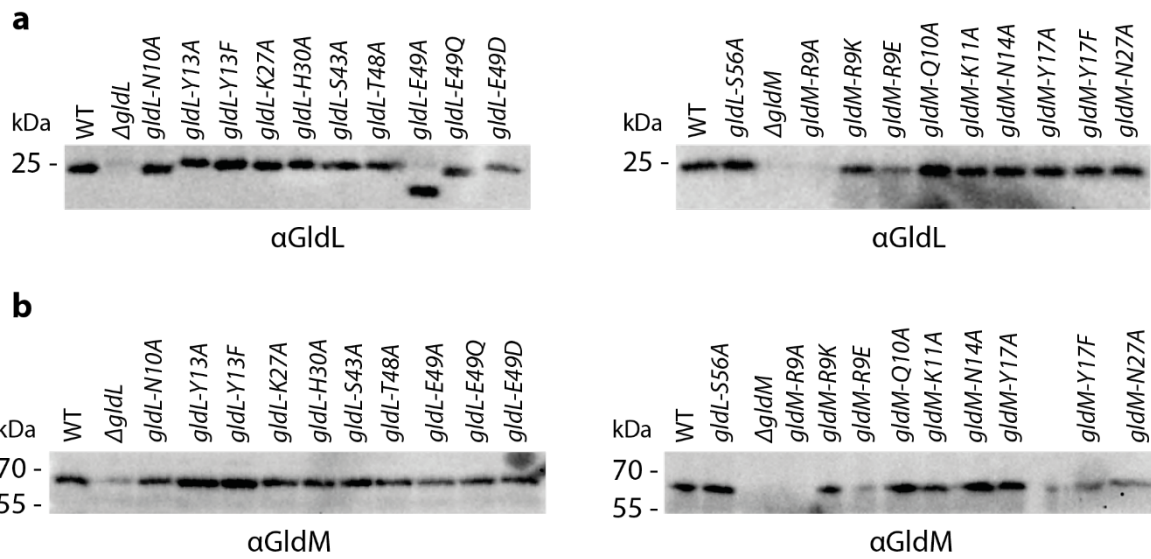

832  
833  
834  
835  
836  
837  
838  
839  
840

**Extended Data Fig. 5 | GldL and GldM expression levels in *gldL* and *gldM* mutant strains.**

Whole cell immunoblotting of the indicated strains for the presence of (a) GldL and (b) GldM. Similar data were obtained for three independent preparations.

841 **Extended Data Table 1: Cryo-EM data collection, refinement and validation statistics.**

|                                           | F. johnsoniae GldLM<br>(EMD-10893)<br>(PDB 6YS8) | P. gingivalis PorLM<br>(EMD-10894) |
|-------------------------------------------|--------------------------------------------------|------------------------------------|
| <b>Data collection and processing</b>     |                                                  |                                    |
| Magnification                             | 165,000                                          | 165,000                            |
| Voltage (kV)                              | 300                                              | 300                                |
| Electron exposure (e-/Å <sup>2</sup> )    | 48                                               | 48                                 |
| Defocus range (µm)                        | 1.0-3.0                                          | 1.0-3.0                            |
| Pixel size (Å)                            | 0.822                                            | 0.822                              |
| Symmetry imposed                          | C1                                               | C1                                 |
| Initial particle images (no.)             | 3,284,887                                        | 1,133,336                          |
| Final particle images (no.)               | 119,230                                          | 199,929                            |
| Map resolution (Å)                        | 3.9                                              | 8.6                                |
| FSC threshold                             | 0.143                                            | 0.143                              |
| Map resolution range (Å)                  | 3.5-5.8                                          |                                    |
| <b>Refinement</b>                         |                                                  |                                    |
| Initial model used (PDB code)             | None                                             |                                    |
| Model resolution (Å)                      | 3.9                                              |                                    |
| FSC threshold                             | 0.143                                            |                                    |
| Model resolution range (Å)                | 3.5-5.8                                          |                                    |
| Map sharpening B factor (Å <sup>2</sup> ) | -131                                             |                                    |
| Model composition                         |                                                  |                                    |
| Non-hydrogen atoms                        | 5624                                             |                                    |
| Protein residues                          | 737                                              |                                    |
| Ligands                                   | 0                                                |                                    |
| B factors (Å <sup>2</sup> )               |                                                  |                                    |
| Protein                                   | 117                                              |                                    |
| Ligand                                    | NA                                               |                                    |
| R.m.s. deviations                         |                                                  |                                    |
| Bond lengths (Å)                          | 0.007                                            |                                    |
| Bond angles (°)                           | 1.186                                            |                                    |
| Validation                                |                                                  |                                    |
| MolProbity score                          | 2.22                                             |                                    |
| Clashscore                                | 10.52                                            |                                    |
| Poor rotamers (%)                         | 1.70                                             |                                    |
| Ramachandran plot                         |                                                  |                                    |
| Favored (%)                               | 91.42                                            |                                    |
| Allowed (%)                               | 6.36                                             |                                    |
| Disallowed (%)                            | 2.21                                             |                                    |

843 **Extended Data Table 2 | Contacts between the periplasmic loops of GldL and GldM.**

844 The PDBePISA server (<http://www.ebi.ac.uk/pdbe/pisart.html>)<sup>53</sup> was used to calculate the sizes of  
 845 the interfaces between the periplasmic loops of each copy of GldL and the periplasmic  
 846 domains of GldM. The periplasmic loops of GldL were taken to include residues 29-41.

| GldM Copy | GldL Copy | GldL Buried Surface area (Å <sup>2</sup> ) | Number of GldL Residues | GldL Residues                                          | GldM Residues                                                  |
|-----------|-----------|--------------------------------------------|-------------------------|--------------------------------------------------------|----------------------------------------------------------------|
| A         | C         | 265.4                                      | 8                       | Thr29, His30, Phe31, Glu32, Thr37, Gly38, Thr39, Val40 | Arg120, Asp122, Asp125, Asp126, Phe128, Thr129, Gly130, Lys193 |
| A         | D         | 107.4                                      | 3                       | Thr29, His30, Thr39                                    | Met26, Lys30, Glu116, Ala117, Asp119, Arg120                   |
| A         | E         | 139.5                                      | 4                       | Thr29, His30, Phe31, Glu32                             | Met26, Asn27, Ser29, Lys30, Glu31                              |
| A         | F         | 125.8                                      | 3                       | His30, Thr37, Thr39                                    | Lys180, Glu181, Ile183                                         |
| A         | G         | 183.8                                      | 4                       | Thr29, His30, Thr37, Thr39                             | Thr129, Gly130, Asp131, Asn179, Ile183, Lys184, Glu185         |
| B         | C         | -                                          | -                       | -                                                      | -                                                              |
| B         | D         | -                                          | -                       | -                                                      | -                                                              |
| B         | E         | 64.4                                       | 5                       | Phe31, Glu32, Thr37, Thr39, Val40                      | Arg120, Asp122, Lys180, Gly194                                 |
| B         | F         | 97.2                                       | 2                       | Thr29, His30                                           | Val28, Ser29, Ile33, Glu116, Ala117, Asp119                    |
| B         | G         | 18.1                                       | 1                       | His30                                                  | Met26                                                          |

847

848

849 **Extended Data Table 3** | Gliding motility and T9SS phenotypes of mutant strains.

| Strain                      | Gliding on PY2 agar | Gliding on glass        | Chitinase assay (arbitrary units $\pm$ s.d.) | SprB propulsion (nm s <sup>-1</sup> $\pm$ s.d.) | GldL stability | GldM stability |
|-----------------------------|---------------------|-------------------------|----------------------------------------------|-------------------------------------------------|----------------|----------------|
| WT                          | +++                 | Glides normally         | 1.00 $\pm$ 0.2                               | 1358 $\pm$ 900                                  | Present        | Present        |
| $\Delta$ <i>gldL</i>        | -                   | Does not adhere         | 0.00 $\pm$ 0.0                               | n.d.                                            | None           | Reduced        |
| <i>gldL</i> <sub>N10A</sub> | +++                 | Glides normally         | 1.09 $\pm$ 0.3                               | n.d.                                            | Present        | Present        |
| <i>gldL</i> <sub>Y13A</sub> | -                   | Adheres, does not glide | 0.41 $\pm$ 0.1                               | 275 $\pm$ 100                                   | Present        | Present        |
| <i>gldL</i> <sub>Y13F</sub> | -                   | Adheres, does not glide | 1.37 $\pm$ 0.5                               | n.d.                                            | Present        | Present        |
| <i>gldL</i> <sub>K27A</sub> | -                   | Adheres, does not glide | 0.40 $\pm$ 0.1                               | 31 $\pm$ 20                                     | Present        | Present        |
| <i>gldL</i> <sub>H30A</sub> | ++                  | Glides slowly           | 1.16 $\pm$ 0.2                               | 524 $\pm$ 200                                   | Present        | Present        |
| <i>gldL</i> <sub>S43A</sub> | +++                 | Glides normally         | 0.96 $\pm$ 0.3                               | n.d.                                            | Present        | Present        |
| <i>gldL</i> <sub>T48A</sub> | +++                 | Glides normally         | 1.15 $\pm$ 0.6                               | n.d.                                            | Present        | Present        |
| <i>gldL</i> <sub>E49A</sub> | -                   | Does not adhere         | 0.00 $\pm$ 0.0                               | n.d.                                            | Clipped        | Present        |
| <i>gldL</i> <sub>E49Q</sub> | -                   | Does not adhere         | 0.00 $\pm$ 0.0                               | n.d.                                            | Present        | Present        |
| <i>gldL</i> <sub>E49D</sub> | -                   | Very few cells adhere   | 0.02 $\pm$ 0.0                               | n.d.                                            | Present        | Present        |
| <i>gldL</i> <sub>S56A</sub> | +++                 | Glides normally         | 0.88 $\pm$ 0.2                               | n.d.                                            | Present        | Present        |
| $\Delta$ <i>gldM</i>        | -                   | Does not adhere         | 0.00 $\pm$ 0.0                               | n.d.                                            | None           | None           |
| <i>gldM</i> <sub>R9A</sub>  | -                   | Does not adhere         | 0.00 $\pm$ 0.0                               | n.d.                                            | None           | None           |
| <i>gldM</i> <sub>R9K</sub>  | ++                  | Glides slowly           | 0.95 $\pm$ 0.2                               | 486 $\pm$ 200                                   | Present        | Present        |
| <i>gldM</i> <sub>R9E</sub>  | -                   | Does not adhere         | 0.01 $\pm$ 0.0                               | n.d.                                            | Reduced        | Reduced        |

|                            |     |                         |            |           |         |         |
|----------------------------|-----|-------------------------|------------|-----------|---------|---------|
| <i>gldM<sub>Q10A</sub></i> | +++ | Glides normally         | 0.98 ± 0.3 | n.d.      | Present | Present |
| <i>gldM<sub>K11A</sub></i> | +++ | Glides normally         | 0.91 ± 0.1 | n.d.      | Present | Present |
| <i>gldM<sub>N14A</sub></i> | +++ | Glides normally         | 1.10 ± 0.3 | n.d.      | Present | Present |
| <i>gldM<sub>Y17A</sub></i> | -   | Adheres, does not glide | 0.11 ± 0.0 | n.d.      | Present | Present |
| <i>gldM<sub>Y17F</sub></i> | +   | Glides slowly           | 1.13 ± 0.4 | 774 ± 400 | Present | Present |
| <i>gldM<sub>N27A</sub></i> | +++ | Glides normally         | 1.30 ± 0.5 | n.d.      | Present | Present |

850

851

852

853 **Extended Data Table 4 | Bacterial strains used in this study.**

| Strain                      | Genotype                                                                                                                   | Reference  |
|-----------------------------|----------------------------------------------------------------------------------------------------------------------------|------------|
| <b><i>E. coli</i></b>       |                                                                                                                            |            |
| S17-1                       | <i>pro, res<sup>-</sup> hsdR17 (rK<sup>-</sup> mK<sup>+</sup>) recA<sup>-</sup>, RP4-2-Tc::Mu-Km::Tn7, Tpr<sup>r</sup></i> | 32         |
| BL21 Star™ (DE3)            | F- <i>ompT hsdS<sub>B</sub> (r<sub>B</sub><sup>-</sup>, m<sub>B</sub><sup>-</sup>) gal dcm rne131</i> (DE3)                | Invitrogen |
| <b><i>F. johnsoniae</i></b> |                                                                                                                            |            |
| UW101                       |                                                                                                                            | 54         |
| Fl_004                      | UW101 $\Delta$ <i>sprA</i>                                                                                                 | 20         |
| Fl_030                      | UW101 $\Delta$ <i>porV</i>                                                                                                 | 20         |
| Fl_082                      | UW101 $\Delta$ <i>gldL</i>                                                                                                 | This study |
| Rhj_006                     | UW101 $\Delta$ <i>gldM</i>                                                                                                 | This study |
| Rhj_004                     | UW101 <i>gldL</i> - <i>twinstrep</i>                                                                                       | This study |
| Rhj_017                     | UW101 <i>gldL</i> <sub>N10A</sub>                                                                                          | This study |
| Rhj_018                     | UW101 <i>gldL</i> <sub>Y13A</sub>                                                                                          | This study |
| Rhj_024                     | UW101 <i>gldL</i> <sub>Y13F</sub>                                                                                          | This study |
| Rhj_019                     | UW101 <i>gldL</i> <sub>K27A</sub>                                                                                          | This study |
| Rhj_011                     | UW101 <i>gldL</i> <sub>H30A</sub>                                                                                          | This study |
| Rhj_013                     | UW101 <i>gldL</i> <sub>S43A</sub>                                                                                          | This study |
| Rhj_020                     | UW101 <i>gldL</i> <sub>T48A</sub>                                                                                          | This study |
| Rhj_021                     | UW101 <i>gldL</i> <sub>E49A</sub>                                                                                          | This study |
| Rhj_022                     | UW101 <i>gldL</i> <sub>E49Q</sub>                                                                                          | This study |
| Rhj_025                     | UW101 <i>gldL</i> <sub>E49D</sub>                                                                                          | This study |
| Rhj_023                     | UW101 <i>gldL</i> <sub>S56A</sub>                                                                                          | This study |
| Rhj_035                     | UW101 <i>gldM</i> <sub>R9A</sub>                                                                                           | This study |
| Rhj_032                     | UW101 <i>gldM</i> <sub>R9K</sub>                                                                                           | This study |
| Rhj_029                     | UW101 <i>gldM</i> <sub>R9E</sub>                                                                                           | This study |
| Rhj_012                     | UW101 <i>gldM</i> <sub>Q10A</sub>                                                                                          | This study |
| Rhj_030                     | UW101 <i>gldM</i> <sub>K11A</sub>                                                                                          | This study |
| Rhj_016                     | UW101 <i>gldM</i> <sub>N14A</sub>                                                                                          | This study |
| Rhj_014                     | UW101 <i>gldM</i> <sub>Y17A</sub>                                                                                          | This study |
| Rhj_015                     | UW101 <i>gldM</i> <sub>Y17F</sub>                                                                                          | This study |
| Rhj_028                     | UW101 <i>gldM</i> <sub>N27A</sub>                                                                                          | This study |
| Rhj_031                     | UW101 <i>gldL</i> <sub>N10A</sub> - <i>twinstrep</i>                                                                       | This study |
| Rhj_033                     | UW101 <i>gldL</i> <sub>Y13A</sub> - <i>twinstrep</i>                                                                       | This study |
| Rhj_041                     | UW101 <i>gldL</i> <sub>Y13F</sub> - <i>twinstrep</i>                                                                       | This study |
| Rhj_053                     | UW101 <i>gldL</i> <sub>K27A</sub> - <i>twinstrep</i>                                                                       | This study |
| Rhj_027                     | UW101 <i>gldL</i> <sub>H30A</sub> - <i>twinstrep</i>                                                                       | This study |
| Rhj_042                     | UW101 <i>gldL</i> <sub>S43A</sub> - <i>twinstrep</i>                                                                       | This study |
| Rhj_034                     | UW101 <i>gldL</i> <sub>T48A</sub> - <i>twinstrep</i>                                                                       | This study |
| Rhj_039                     | UW101 <i>gldL</i> <sub>E49A</sub> - <i>twinstrep</i>                                                                       | This study |
| Rhj_026                     | UW101 <i>gldL</i> <sub>E49Q</sub> - <i>twinstrep</i>                                                                       | This study |
| Rhj_050                     | UW101 <i>gldL</i> <sub>E49D</sub> - <i>twinstrep</i>                                                                       | This study |
| Rhj_038                     | UW101 <i>gldL</i> <sub>S56A</sub> - <i>twinstrep</i>                                                                       | This study |
| Rhj_049                     | UW101 <i>gldL</i> - <i>twinstrep gldM</i> <sub>R9A</sub>                                                                   | This study |
| Rhj_045                     | UW101 <i>gldL</i> - <i>twinstrep gldM</i> <sub>R9K</sub>                                                                   | This study |
| Rhj_040                     | UW101 <i>gldL</i> - <i>twinstrep gldM</i> <sub>R9E</sub>                                                                   | This study |
| Rhj_046                     | UW101 <i>gldL</i> - <i>twinstrep gldM</i> <sub>Q10A</sub>                                                                  | This study |
| Rhj_044                     | UW101 <i>gldL</i> - <i>twinstrep gldM</i> <sub>K11A</sub>                                                                  | This study |
| Rhj_051                     | UW101 <i>gldL</i> - <i>twinstrep gldM</i> <sub>N14A</sub>                                                                  | This study |
| Rhj_43                      | UW101 <i>gldL</i> - <i>twinstrep gldM</i> <sub>Y17A</sub>                                                                  | This study |
| Rhj_37                      | UW101 <i>gldL</i> - <i>twinstrep gldM</i> <sub>Y17F</sub>                                                                  | This study |
| Rhj_052                     | UW101 <i>gldL</i> - <i>twinstrep gldM</i> <sub>N27A</sub>                                                                  | This study |
| Ak_73                       | UW101 $\Delta$ <i>porV halotag::sprB</i>                                                                                   | This study |
| Ak_203                      | AK_73 $\Delta$ <i>gldM</i>                                                                                                 | This study |
| Ak_205                      | AK_73 $\Delta$ <i>gldL</i>                                                                                                 | This study |
| Ak_196                      | AK_73 <i>gldL</i> <sub>Y13A</sub>                                                                                          | This study |
| Ak_197                      | AK_73 <i>gldL</i> <sub>H30A</sub>                                                                                          | This study |
| Ak_198                      | AK_73 <i>gldL</i> <sub>K27A</sub>                                                                                          | This study |
| Ak_199                      | AK_73 <i>gldM</i> <sub>Y17F</sub>                                                                                          | This study |
| Ak_289                      | AK_73 <i>gldM</i> <sub>R9K</sub>                                                                                           | This study |

854

855 **Extended Data Table 5 | Plasmids used in this study.**

| Plasmid                       | Description <sup>a</sup>                                                                                                                                                                                     | Reference  |
|-------------------------------|--------------------------------------------------------------------------------------------------------------------------------------------------------------------------------------------------------------|------------|
| pGEM-T                        | General cloning vector; Ap <sup>r</sup>                                                                                                                                                                      | Promega    |
| pWALDO-sfGFPd                 | pET28(+a) derived expression vector fusing a TEV cleavage site, superfolder GFP, and a His <sub>6</sub> tag to the C-terminus of the expressed protein; Kan <sup>r</sup>                                     | 28         |
| pCDFDuet-1                    | Co-expression of two <i>orfs</i> under the control of T7lac promoters; <i>ori</i> CDF, Sm <sup>r</sup>                                                                                                       | Novagen    |
| pETDuet-1                     | Co-expression of two <i>orfs</i> under the control of T7lac promoters; <i>ori</i> ColE1, Ap <sup>r</sup>                                                                                                     | Novagen    |
| pT12_SpaPQR <sup>3xFLAG</sup> | Encodes <i>Salmonella enterica</i> serovar Typhimurium <i>SpaPQR</i> operon with a C-terminal 3xFLAG tag on SpaR under the control of the <i>E. coli rhaB</i> promoter; <i>ori</i> cloDF13, Kan <sup>r</sup> | 27         |
| pYT313                        | <i>sacB</i> -containing mobilizable suicide vector; Ap <sup>r</sup> (Em <sup>r</sup> )                                                                                                                       | 29         |
| pYT354                        | <i>sacB</i> -containing mobilizable suicide vector; Ap <sup>r</sup> (Em <sup>r</sup> )                                                                                                                       | 29         |
| pRHJ006                       | pETDuet-1 <i>porL</i> ( <i>tev</i> )- <i>gfp</i> -8xHis <i>porM</i> - <i>twinstrep</i>                                                                                                                       | This study |
| pRHJ007                       | pT12 <i>gldL gldM</i> (1-225)- <i>twinstrep</i>                                                                                                                                                              | This study |
| pRHJ008                       | pT12 <i>gldL gldM</i> (1-232)- <i>twinstrep</i>                                                                                                                                                              | This study |
| pRHJ011                       | Suicide plasmid used to delete <i>gldM</i> ; 2.7-kbp upstream and 2.5-kbp downstream of <i>gldM</i> in pYT354                                                                                                | This study |
| pRHJ012                       | pGEM-T <i>gdl</i>                                                                                                                                                                                            | This study |
| pRHJ013                       | pGEM-T <i>gldM</i>                                                                                                                                                                                           | This study |
| pRHJ036                       | Suicide plasmid used to introduce the N10A codon change into <i>gldL</i> ; <i>gldL</i> (N10A) in pYT354                                                                                                      | This study |
| pRHJ037                       | Suicide plasmid used to introduce the Y13A codon change into <i>gldL</i> ; <i>gldL</i> (Y13A) in pYT354                                                                                                      | This study |
| pRHJ038                       | Suicide plasmid used to introduce the Y13F codon change into <i>gldL</i> ; <i>gldL</i> (Y13F) in pYT354                                                                                                      | This study |
| pRHJ039                       | Suicide plasmid used to introduce the K27A codon change into <i>gldL</i> ; <i>gldL</i> (K27A) in pYT354                                                                                                      | This study |
| pRHJ040                       | Suicide plasmid used to introduce the H30A codon change into <i>gldL</i> ; <i>gldL</i> (H30A) in pYT354                                                                                                      | This study |
| pRHJ041                       | Suicide plasmid used to introduce the S43A codon change into <i>gldL</i> ; <i>gldL</i> (S43A) in pYT354                                                                                                      | This study |
| pRHJ042                       | Suicide plasmid used to introduce the T48A codon change into <i>gldL</i> ; <i>gldL</i> (T48A) in pYT354                                                                                                      | This study |
| pRHJ043                       | Suicide plasmid used to introduce the E49A codon change into <i>gldL</i> ; <i>gldL</i> (E49A) in pYT354                                                                                                      | This study |
| pRHJ044                       | Suicide plasmid used to introduce the E49Q codon change into <i>gldL</i> ; <i>gldL</i> (E49Q) in pYT354                                                                                                      | This study |
| pRHJ045                       | Suicide plasmid used to introduce the E49D codon change into <i>gldL</i> ; <i>gldL</i> (E49D) in pYT354                                                                                                      | This study |
| pRHJ046                       | Suicide plasmid used to introduce the S56A codon change into <i>gldL</i> ; <i>gldL</i> (S56A) in pYT354                                                                                                      | This study |
| pRHJ047                       | Suicide plasmid used to introduce the R9A codon change into <i>gldM</i> ; <i>gldM</i> (R9A) in pYT354                                                                                                        | This study |
| pRHJ048                       | Suicide plasmid used to introduce the R9K codon change into <i>gldM</i> ; <i>gldM</i> (R9K) in pYT354                                                                                                        | This study |
| pRHJ049                       | Suicide plasmid used to introduce the R9E codon change into <i>gldM</i> ; <i>gldM</i> (R9E) in pYT354                                                                                                        | This study |
| pRHJ050                       | Suicide plasmid used to introduce the Q10A codon change into <i>gldM</i> ; <i>gldM</i> (Q10A) in pYT354                                                                                                      | This study |
| pRHJ051                       | Suicide plasmid used to introduce the K11A codon change into <i>gldM</i> ; <i>gldM</i> (K11A) in pYT354                                                                                                      | This study |
| pRHJ052                       | Suicide plasmid used to introduce the N14A codon change into <i>gldM</i> ; <i>gldM</i> (N14A) in pYT354                                                                                                      | This study |
| pRHJ053                       | Suicide plasmid used to introduce the Y17A codon change into <i>gldM</i> ; <i>gldM</i> (Y17A) in pYT354                                                                                                      | This study |
| pRHJ054                       | Suicide plasmid used to introduce the Y17F codon change into <i>gldM</i> ; <i>gldM</i> (Y17F) in pYT354                                                                                                      | This study |
| pRHJ055                       | Suicide plasmid used to introduce the N27A codon change into <i>gldM</i> ; <i>gldM</i> (N27A) in pYT354                                                                                                      | This study |
| pRHJ058                       | Suicide plasmid used to introduce a Twin-Strep tag coding sequence to the end of <i>gdl</i>                                                                                                                  | This study |
| pRHJ059                       | Suicide plasmid used to construct the <i>gdl</i> (N10A)- <i>twinstrep</i> strain                                                                                                                             | This study |
| pRHJ060                       | Suicide plasmid used to construct the <i>gdl</i> (Y13A)- <i>twinstrep</i> strain                                                                                                                             | This study |
| pRHJ061                       | Suicide plasmid used to construct the <i>gdl</i> (Y13F)- <i>twinstrep</i> strain                                                                                                                             | This study |
| pRHJ062                       | Suicide plasmid used to construct the <i>gdl</i> (K27A)- <i>twinstrep</i> strain                                                                                                                             | This study |
| pRHJ063                       | Suicide plasmid used to construct the <i>gdl</i> (H30A)- <i>twinstrep</i> strain                                                                                                                             | This study |
| pRHJ064                       | Suicide plasmid used to construct the <i>gdl</i> (S43A)- <i>twinstrep</i> strain                                                                                                                             | This study |
| pRHJ065                       | Suicide plasmid used to construct the <i>gdl</i> (T48A)- <i>twinstrep</i> strain                                                                                                                             | This study |
| pRHJ066                       | Suicide plasmid used to construct the <i>gdl</i> (E49A)- <i>twinstrep</i> strain                                                                                                                             | This study |
| pRHJ067                       | Suicide plasmid used to construct the <i>gdl</i> (E49Q)- <i>twinstrep</i> strain                                                                                                                             | This study |
| pRHJ068                       | Suicide plasmid used to construct the <i>gdl</i> (E49D)- <i>twinstrep</i> strain                                                                                                                             | This study |
| pRHJ069                       | Suicide plasmid used to construct the <i>gdl</i> (S56A)- <i>twinstrep</i> strain                                                                                                                             | This study |
| pRHJ070                       | Suicide plasmid used to construct the <i>gdl</i> - <i>twinstrep gldM</i> (R9A) strain                                                                                                                        | This study |
| pRHJ071                       | Suicide plasmid used to construct the <i>gdl</i> - <i>twinstrep gldM</i> (R9K) strain                                                                                                                        | This study |
| pRHJ072                       | Suicide plasmid used to construct the <i>gdl</i> - <i>twinstrep gldM</i> (R9E) strain                                                                                                                        | This study |
| pRHJ073                       | Suicide plasmid used to construct the <i>gdl</i> - <i>twinstrep gldM</i> (Q10A) strain                                                                                                                       | This study |
| pRHJ074                       | Suicide plasmid used to construct the <i>gdl</i> - <i>twinstrep gldM</i> (K11A) strain                                                                                                                       | This study |
| pRHJ075                       | Suicide plasmid used to construct the <i>gdl</i> - <i>twinstrep gldM</i> (N14A) strain                                                                                                                       | This study |
| pRHJ076                       | Suicide plasmid used to construct the <i>gdl</i> - <i>twinstrep gldM</i> (Y17A) strain                                                                                                                       | This study |
| pRHJ077                       | Suicide plasmid used to construct the <i>gdl</i> - <i>twinstrep gldM</i> (Y17F) strain                                                                                                                       | This study |
| pRHJ078                       | Suicide plasmid used to construct the <i>gdl</i> - <i>twinstrep gldM</i> (N27A) strain                                                                                                                       | This study |
| pAK021                        | Suicide plasmid used to insert a HaloTag domain after the signal peptide of SprB                                                                                                                             | This study |
| pFL43                         | Expresses the cytoplasmic domain of GldL; pWALDO-sfGFPd <i>gdl</i> (66-215)                                                                                                                                  | This study |
| pFL44                         | Expresses the periplasmic domain of GldM; pWALDO-sfGFPd <i>gldM</i> (78-513)                                                                                                                                 | This study |
| pFL80                         | Suicide plasmid used to delete <i>porV</i> ; 2.5-kbp upstream and 2.5-kbp downstream of <i>porV</i> in pYT313                                                                                                | 20         |
| pFL89                         | Suicide plasmid used to delete <i>gdl</i> ; 2.6-kbp upstream and 2.5-kbp downstream of <i>gdl</i> in pYT313                                                                                                  | This study |
| pPG01                         | Expresses the first 50 amino acids of RemA fused to mCherry and the C-terminal 97 amino acids of RemA; pCP-remA <sub>50</sub> -mch-CTD97 <sub>remA</sub>                                                     | This study |
| pPG02                         | Expresses the first 50 amino acids of RemA fused to mCherry and the C-terminal 97 amino acids of RemA with the K1432A point mutation; pCP-remA <sub>50</sub> -mch-CTD97(K1432A) <sub>remA</sub>              | This study |

856

857 **Footnote:** <sup>a</sup> Selection markers functional in *F. johnsoniae* are in brackets

858

859 **Supplementary Data Table 1:** Oligonucleotides used in this study.

860

861 **Supplementary Data Video 1:** Mutant strains gliding on glass. WT, *gldL<sub>Y13A</sub>*, *gldL<sub>Y13F</sub>*, *gldL<sub>K27A</sub>*, *gldL<sub>H30A</sub>*,

862 *gldL<sub>E49D</sub>*, *gldM<sub>R9K</sub>*, *gldM<sub>Y17A</sub>* and *gldM<sub>Y17F</sub>* cells are shown.

863 **Supplementary Data Video 2:** Fluorophore-labelled SprB adhesin moving on the surface of a WT cell.

864 **Supplementary Data Video 3:** Fluorophore-labelled SprB adhesin moving on the surface of a *gldL<sub>Y13A</sub>*

865 cell.

866 **Supplementary Data Video 4:** Fluorophore-labelled SprB adhesin moving on the surface of a *gldL<sub>K27A</sub>*

867 cell.

868 **Supplementary Data Video 5:** Fluorophore-labelled SprB adhesin moving on the surface of a *gldL<sub>H30A</sub>*

869 cell.

870 **Supplementary Data Video 6:** Fluorophore-labelled SprB adhesin moving on the surface of a *gldM<sub>R9K</sub>*

871 cell.

872 **Supplementary Data Video 7:** Fluorophore-labelled SprB adhesin moving on the surface of a -

873 *gldM<sub>Y17F</sub>* cell.

874 **Supplementary Data Video 8:** Animation of a rotary model of GldLM function.

875
